# Supplementary material
Source: PubMed Central journal article supplement (PMC7805560)
Supplement: NIHMS1610142-supplement-Supplementary_Material.pdf [file NIHMS1610142-supplement-Supplementary_Material.pdf]

A Germline Variant at 8q24 Contributes to Familial Clustering of Prostate Cancer in Men of African Ancestry

## **Supplementary Information**

### **Supplementary Methods**

Methods

#### **Participants**

Participants included men of African ancestry with genome-wide genotyping data, with N=9,463 from the African Ancestry Prostate Cancer (AAPC) GWAS Consortium and N=8,184 from the ELLIPSE/PRACTICAL OncoArray Consortium (Supplemental Table 3)[1, 2]. This study was conducted with the approval of the institutional review boards at each participating institution, and all subjects provided written informed consent to participate in the study.

An additional 144 participants were included from the following high-risk prostate cancer family studies.

Prostate Cancer Genetic Research Study (PROGRESS) (11 cases genotyped)

Hereditary prostate cancer families were ascertained from North America and several other countries by advertising a toll-free number via public media, health-related publications, and the internet, as well as communications with urologists, other health-care professionals, and prostate cancer support groups[3-5]. Eligible families met at least one of the following criteria: (1) having three or more first-degree relatives with prostate cancer; (2) having three generations with prostate cancer, either through

paternal or maternal lineage; or (3) having two first-degree relatives with prostate cancer diagnosed before age 65 or who were African-American. Participants completed a study questionnaire on medical and family cancer history and provided a blood sample. Affected men were also asked to sign a consent form for release of medical records related to the prostate cancer diagnosis and treatment. Study forms and protocols were approved by the Institutional Review Board of the Fred Hutchinson Cancer Research Center.

#### Louisiana State University Health Sciences Center (20 cases genotyped)

African American hereditary prostate cancer families were recruited primarily through collaborating hospitals and physicians in Louisiana[6, 7]. In addition to being African American, families enrolled met the following inclusion criteria: three or more family members with prostate cancer, histopathological evidence of prostate cancer with clinical staging, and two or more living affected family members. Affected participants provided a blood sample for genotyping and consent to obtain medical records to verify prostate cancer diagnosis. For deceased family members with a reported history of prostate cancer, disease status was verified with medical documentation when available from the treating hospitals, confirmation through Louisiana Tumor Registry records, or death certificates. All study-related materials were approved by Louisiana State University Health Sciences Center Institutional Review Board.

#### ICPG for Identifying Prostate Cancer Genes (63 cases genotyped)

Participants included men with prostate cancer who had at least one first- or second-degree relative who also had prostate cancer or those in whom prostate cancer had

been diagnosed at an age of 55 years or less, regardless of family history[8]. Families were ascertained from three sources. A majority were ascertained through referrals generated as a response to a letter to 8,000 urologists throughout the US. The second source was from family history records of the patient population seen at Johns Hopkins Hospital for treatment of prostate cancer. The third source was the respondents to articles published in a variety of lay publications describing the prostate cancer family studies. The diagnosis of prostate cancer was confirmed by reviewing medical records in each proband and whenever possible in other family members. African ancestry was self-reported. All subjects provided written informed consent to participate in the study. The protocol and consent documents were approved by the Institutional Review Board at the Johns Hopkins University, School of Medicine.

University of Michigan Prostate Cancer Genetics Project (UM-PCGP) (49 cases genotyped)

Samples from the University of Michigan Prostate Cancer Genetics Project (UM-PCGP) were used for this analysis. The UM-PCGP enrolled men with prostate cancer who had at least one living first- or second-degree relative who also had prostate cancer or men diagnosed with prostate cancer at or before age 55 years, regardless of family history. The diagnosis of prostate cancer was confirmed by reviewing medical records whenever possible. African ancestry was self-reported. All subjects provided written informed consent to participate in the study. The protocol and consent documents were approved by the institutional review board at the University of Michigan Medical School and Duke University Medical School.

## Genotyping

AAPC samples were genotyped on the Illumina Human 1M array and ELLIPSE/PRACTICAL samples were genotyped on the Illumina OncoArray. Genotype calling and quality control for AAPC and the OncoArray are described in detail elsewhere[1, 9, 10]. Data were phased using SHAPEIT[11], and imputations were performed using Phase 3 of the 1000 Genomes as the reference panel[12]. The rs72725854 variant (A>T) was imputed using IMPUTEv2[13, 14] in AAPC samples and Minimac3 Version 1.0.12[15] in OncoArray samples. The info score for rs72725854 was 0.965 for AAPC samples and 0.972 in the OncoArray samples. We genotyped rs72725854 using TaqMan in a subset of 1,093 AAPC samples and found a high concordance between the imputed and genotyped variant (concordance rate=98.35%). Genotyping of rs72725854 in the 144 participants from hereditary prostate cancer family studies was performed using TaqMan (genotyping call rate=100%). These sample were additionally genotyped using the Illumina H3Africa array to calculate principal components (described below). Using genotyping data from this array, one familial case from UM-PCGP was genetically identified as female and excluded from analyses.

## Statistical Analyses

To assess the association between germline variant rs72725854 and prostate cancer, logistic regression models were run in SAS version 9.4, adjusting for age at diagnosis for cases or at last study visit for controls, study, and the first two principal components (described below) to account for potential population stratification. Models were run separately for participants from the AAPC and OncoArray, and the resulting summary statistics were meta-analyzed using METAL[16]. Analyses were repeated comparing

controls to cases with and without a family history of prostate cancer (defined as one or more first-degree relatives with prostate cancer), cases stratified by age of diagnosis (<60 vs. ≥60 years), cases with lethal prostate cancer (metastatic disease or PSA>100 or died of prostate cancer), cases with low-risk disease (Gleason scores<7 and localized), familial cases, familial cases with two or more first-degree relatives with prostate cancer, and familial cases with an age of diagnosis <60 years. We also stratified cases and controls according to carrier status and family history, creating six subgroups (non-carrier FH-, non-carrier FH+, heterozygote carrier FH-, heterozygote carrier FH+, homozygote carrier FH-, and homozygote carrier FH+), and estimated risk in each group relative to non-carriers without a family history. Additive models were used to test the effect of each additional minor allele, and genotypic models were used to compare individuals who were major allele homozygotes (AA) to heterozygotes (TA) and to minor allele homozygotes (TT). *P*-values less than 0.05 were considered statistically significant.

Principal component analyses were performed to calculate principal components (PCs) used to account for potential population stratification. PCs were calculated using 2,546 ancestry-informative SNPs in AAPC (Illumina 1M), 18,176 uncorrelated SNPs on the OncoArray, and 20,588 uncorrelated SNPs in the high-risk prostate cancer family studies (H3Africa array). EIGENSTRAT[17] was used to calculate PCs separately for each of the three sets of participants (details for AAPC and OncoArray have been previously described[1]).

The calculation of global ancestry has been previously described[1]. Briefly, local ancestry was estimated using RFMix[18] (using the forward-backward option, without EM nor phase error correction) and Phase 1 1000 Genomes data[19] (AFR and EUR)

with 220,474 genotyped common ( $MAF \geq 0.01$ ) autosomal variants overlapping between AAPC and ONCO. Global ancestry was then calculated by averaging the local AFR estimates across all autosomal variants, and these estimates were very comparable to STRUCTURE estimates[20]. Risk allele frequencies were then calculated among cases and controls by decile of global African ancestry.

### **Genetic Risk Score**

We constructed a genetic risk score (GRS) using 180 prostate cancer-associated variants and corresponding weights from previous prostate cancer GWAS meta-analyses: 174 from a European study[21, 22], four from an African study[1], and two from an Asian study[23]. A weighted GRS was calculated for each participant as the sum of the number of risk alleles carried by an individual, weighted by previously estimated variant-specific effects. Association tests were performed to assess the association between the GRS and prostate cancer for each GRS decile, using the average 40%-60% category as the reference group. A separate GRS was calculated that included five 8q24 variants previously identified to be associated with prostate cancer within men of African ancestry[1]. Both GRS were recalculated excluding rs72725854 for comparison purposes.

### **Absolute Risk**

Absolute risks of prostate cancer were estimated by rs72725854 genotype and family history (positive and negative) using the odds ratios for each genotype/family history category combined with mortality and incidence rates for African American men from the Multiethnic Cohort (MEC), while accounting for competing causes of death. This

included 6,607 deaths and 1,819 incident cases for African American men identified over a 20-year period (1993-2013)[24, 25]. The averages of the genotype absolute risks were constrained to be comparable with the population incidence[24-27]. The approach constrains the risk category-specific absolute risks for a given age to be equivalent to the age-specific incidences for the entire population. In other words, age-specific incidence rates are calculated to increase or decrease based on the category's estimated risk and the proportion of the population within the category. The calculation accounts for competing causes of death, as well.

Specifically, for a given ethnic group and a given risk category  $k$  (e.g. heterozygous carriers with positive family history), the absolute risk by age  $t$  is computed as:  $AR_k(t) = \sum_0^t P_{ND}(t) S_k(t) I_k(t)$ . This calculation consists of three components:

(1)  $P_{ND}(t)$  is the probability of not dying from another cause of death by age  $t$  using age-specific mortality rates,  $\mu_D(t)$ :  $P_{ND}(t) = \exp[-\sum_0^t \mu_D(t-1)]$ . Age-specific mortality rates are provided from a reference cohort.

(2)  $S_k(t)$  is the probability of surviving prostate cancer by age  $t$  in the risk category  $k$  and uses the prostate cancer incidence by age  $t$  for category  $k$ :  $S_k(t) = \exp[-\sum_0^t I_k(t-1)]$ .

(3) The prostate cancer incidence by age  $t$  for risk category  $k$  is  $I_k(t)$  and is calculated by multiplying the population prostate cancer incidence for the reference category,  $I_0(t)$  and the corresponding risk ratio for category  $k$ , as estimated from the odds ratio obtained from the population-specific individual-level analysis:  $I_k(t) = I_0(t) \exp(\beta_k)$ .

To complete the calculations, the prostate cancer incidence for age  $t$  for the reference category,  $I_0(t)$ , is obtained by constraining the weighted average of the population cancer incidences for all the risk categories to the population age-specific

prostate cancer incidence,  $\mu(t)$ .

$I_0(t) = \mu(t) \frac{\sum_K f_k S_k(t-1)}{\sum_K f_k S_k(t-1) \exp(\beta_k)}$ .  $f_k$  is the frequency of the risk category  $k$  with  $f_k = 0.1$  for all non-reference categories.

By leveraging the definition that  $S_k(t = 0) = 1$ , for all  $k$ , the absolute risks were calculated iteratively by first getting  $I_0(t = 1)$ , then  $I_k(t = 1)$ , then  $S_k(t = 1)$  and finally  $AR_k(t = 1)$ . Subsequent values were then calculated recursively for all  $t$ . Confidence intervals for absolute risk estimates were obtained via a parametric bootstrap repeating the above calculations for 1000 bootstraps with the  $\beta_k$ 's sampled from their corresponding estimated distributions using the standard error of the estimate.

### **Contribution to Familial Relative Risk**

The contribution of the SNP to the familial relative risk (i.e. sibling recurrence risk) was calculated as  $\log(\lambda_m)/\log(\lambda_0)$ , where the SNP-specific familial relative risk is calculated as  $\lambda_m = \frac{(p*r^2+q)}{(p*r+q)^2}$ . Here,  $r$  is the estimated odds ratio for the additive genetic variant,  $p$  is the risk allele frequency, and  $q$  is  $1-p$ [28, 29]. Effect estimates and allele frequencies were obtained from a large African ancestry prostate cancer GWAS[1].  $\lambda_0$  is the observed familial risk to first degree relatives of prostate cancer cases and is assumed to range between 2.0 and 2.5.[30-32]

### **References**

[1] Conti DV, Wang K, Sheng X, Bensen JT, Hazelett DJ, Cook MB, et al. Two Novel Susceptibility Loci for Prostate Cancer in Men of African Ancestry. J Natl Cancer Inst. 2017;109.



[2] Han Y, Rand KA, Hazelett DJ, Ingles SA, Kittles RA, Strom SS, et al. Prostate Cancer Susceptibility in Men of African Ancestry at 8q24. *J Natl Cancer Inst.* 2016;108.

[3] McIndoe RA, Stanford JL, Gibbs M, Jarvik GP, Brandzel S, Neal CL, et al. Linkage analysis of 49 high-risk families does not support a common familial prostate cancer-susceptibility gene at 1q24-25. *American journal of human genetics.* 1997;61:347-53.

[4] Janer M, Friedrichsen DM, Stanford JL, Badzioch MD, Kolb S, Deutsch K, et al. Genomic scan of 254 hereditary prostate cancer families. *Prostate.* 2003;57:309-19.

[5] Stanford JL, FitzGerald LM, McDonnell SK, Carlson EE, McIntosh LM, Deutsch K, et al. Dense genome-wide SNP linkage scan in 301 hereditary prostate cancer families identifies multiple regions with suggestive evidence for linkage. *Human molecular genetics.* 2009;18:1839-48.

[6] Mandal DM, Sartor O, Halton SL, Mercante DE, Bailey-Wilson JE, Rayford W. Recruitment strategies and comparison of prostate cancer-specific clinical data on African-American and Caucasian males with and without family history. *Prostate Cancer Prostatic Dis.* 2008;11:274-9.

[7] Ledet EM, Sartor O, Rayford W, Bailey-Wilson JE, Mandal DM. Suggestive evidence of linkage identified at chromosomes 12q24 and 2p16 in African American prostate cancer families from Louisiana. *Prostate.* 2012;72:938-47.

[8] Xu J, Dimitrov L, Chang BL, Adams TS, Turner AR, Meyers DA, et al. A combined genomewide linkage scan of 1,233 families for prostate cancer-susceptibility genes conducted by the international consortium for prostate cancer genetics. *American journal of human genetics.* 2005;77:219-29.

- [9] Al Olama AA, Kote-Jarai Z, Berndt SI, Conti DV, Schumacher F, Han Y, et al. A meta-analysis of 87,040 individuals identifies 23 new susceptibility loci for prostate cancer. *Nat Genet.* 2014;46:1103-9.
- [10] Amos CI, Dennis J, Wang Z, Byun J, Schumacher FR, Gayther SA, et al. The OncoArray Consortium: A Network for Understanding the Genetic Architecture of Common Cancers. *Cancer Epidemiol Biomarkers Prev.* 2017;26:126-35.
- [11] Delaneau O, Marchini J, Genomes Project C, Genomes Project C. Integrating sequence and array data to create an improved 1000 Genomes Project haplotype reference panel. *Nat Commun.* 2014;5:3934.
- [12] Genomes Project C, Auton A, Brooks LD, Durbin RM, Garrison EP, Kang HM, et al. A global reference for human genetic variation. *Nature.* 2015;526:68-74.
- [13] Marchini J, Howie B. Genotype imputation for genome-wide association studies. *Nat Rev Genet.* 2010;11:499-511.
- [14] Howie BN, Donnelly P, Marchini J. A flexible and accurate genotype imputation method for the next generation of genome-wide association studies. *PLoS Genet.* 2009;5:e1000529.
- [15] Das S, Forer L, Schonherr S, Sidore C, Locke AE, Kwong A, et al. Next-generation genotype imputation service and methods. *Nat Genet.* 2016;48:1284-7.
- [16] Willer CJ, Li Y, Abecasis GR. METAL: fast and efficient meta-analysis of genomewide association scans. *Bioinformatics.* 2010;26:2190-1.
- [17] Price AL, Patterson NJ, Plenge RM, Weinblatt ME, Shadick NA, Reich D. Principal components analysis corrects for stratification in genome-wide association studies. *Nat Genet.* 2006;38:904-9.

- [18] Maples BK, Gravel S, Kenny EE, Bustamante CD. RFMix: a discriminative modeling approach for rapid and robust local-ancestry inference. *American journal of human genetics*. 2013;93:278-88.
- [19] Genomes Project C, Abecasis GR, Auton A, Brooks LD, DePristo MA, Durbin RM, et al. An integrated map of genetic variation from 1,092 human genomes. *Nature*. 2012;491:56-65.
- [20] Liu J, Lewinger JP, Gilliland FD, Gauderman WJ, Conti DV. Confounding and heterogeneity in genetic association studies with admixed populations. *Am J Epidemiol*. 2013;177:351-60.
- [21] Schumacher FR, Al Olama AA, Berndt SI, Benlloch S, Ahmed M, Saunders EJ, et al. Association analyses of more than 140,000 men identify 63 new prostate cancer susceptibility loci. *Nat Genet*. 2018;50:928-36.
- [22] Dadaev T, Saunders EJ, Newcombe PJ, Anokian E, Leongamornlert DA, Brook MN, et al. Fine-mapping of prostate cancer susceptibility loci in a large meta-analysis identifies candidate causal variants. *Nat Commun*. 2018;9:2256.
- [23] Wang M, Takahashi A, Liu F, Ye D, Ding Q, Qin C, et al. Large-scale association analysis in Asians identifies new susceptibility loci for prostate cancer. *Nat Commun*. 2015;6:8469.
- [24] Amin Al Olama A, Benlloch S, Antoniou AC, Giles GG, Severi G, Neal DE, et al. Risk Analysis of Prostate Cancer in PRACTICAL, a Multinational Consortium, Using 25 Known Prostate Cancer Susceptibility Loci. *Cancer Epidemiol Biomarkers Prev*. 2015;24:1121-9.

- [25] Kuchenbaecker KB, McGuffog L, Barrowdale D, Lee A, Soucy P, Dennis J, et al. Evaluation of Polygenic Risk Scores for Breast and Ovarian Cancer Risk Prediction in BRCA1 and BRCA2 Mutation Carriers. *J Natl Cancer Inst.* 2017;109.
- [26] Antoniou AC, Beesley J, McGuffog L, Sinilnikova OM, Healey S, Neuhausen SL, et al. Common breast cancer susceptibility alleles and the risk of breast cancer for BRCA1 and BRCA2 mutation carriers: implications for risk prediction. *Cancer Res.* 2010;70:9742-54.
- [27] Antoniou AC, Pharoah PD, McMullan G, Day NE, Ponder BA, Easton D. Evidence for further breast cancer susceptibility genes in addition to BRCA1 and BRCA2 in a population-based study. *Genetic epidemiology.* 2001;21:1-18.
- [28] Wang K, Dickson SP, Stolle CA, Krantz ID, Goldstein DB, Hakonarson H. Interpretation of association signals and identification of causal variants from genome-wide association studies. *American journal of human genetics.* 2010;86:730-42.
- [29] Witte JS, Visscher PM, Wray NR. The contribution of genetic variants to disease depends on the ruler. *Nature reviews Genetics.* 2014;15:765-76.
- [30] Kicinski M, Vangronsveld J, Nawrot TS. An epidemiological reappraisal of the familial aggregation of prostate cancer: a meta-analysis. *PloS one.* 2011;6:e27130.
- [31] Albright F, Stephenson RA, Agarwal N, Teerlink CC, Lowrance WT, Farnham JM, et al. Prostate cancer risk prediction based on complete prostate cancer family history. *Prostate.* 2015;75:390-8.
- [32] Bruner DW, Moore D, Parlanti A, Dorgan J, Engstrom P. Relative risk of prostate cancer for men with affected relatives: systematic review and meta-analysis. *Int J Cancer.* 2003;107:797-803.

[33] Gouveia MH, Borda V, Leal TP, Moreira RG, Bergen AW, Kehdy FSG, et al. Origins, admixture dynamics and homogenization of the African gene pool in the Americas. *Mol Biol Evol.* 2020.

**Supplemental Figure 1.** Frequency of the T allele and risk genotypes of rs72725854 by family history of prostate cancer and age at diagnosis.

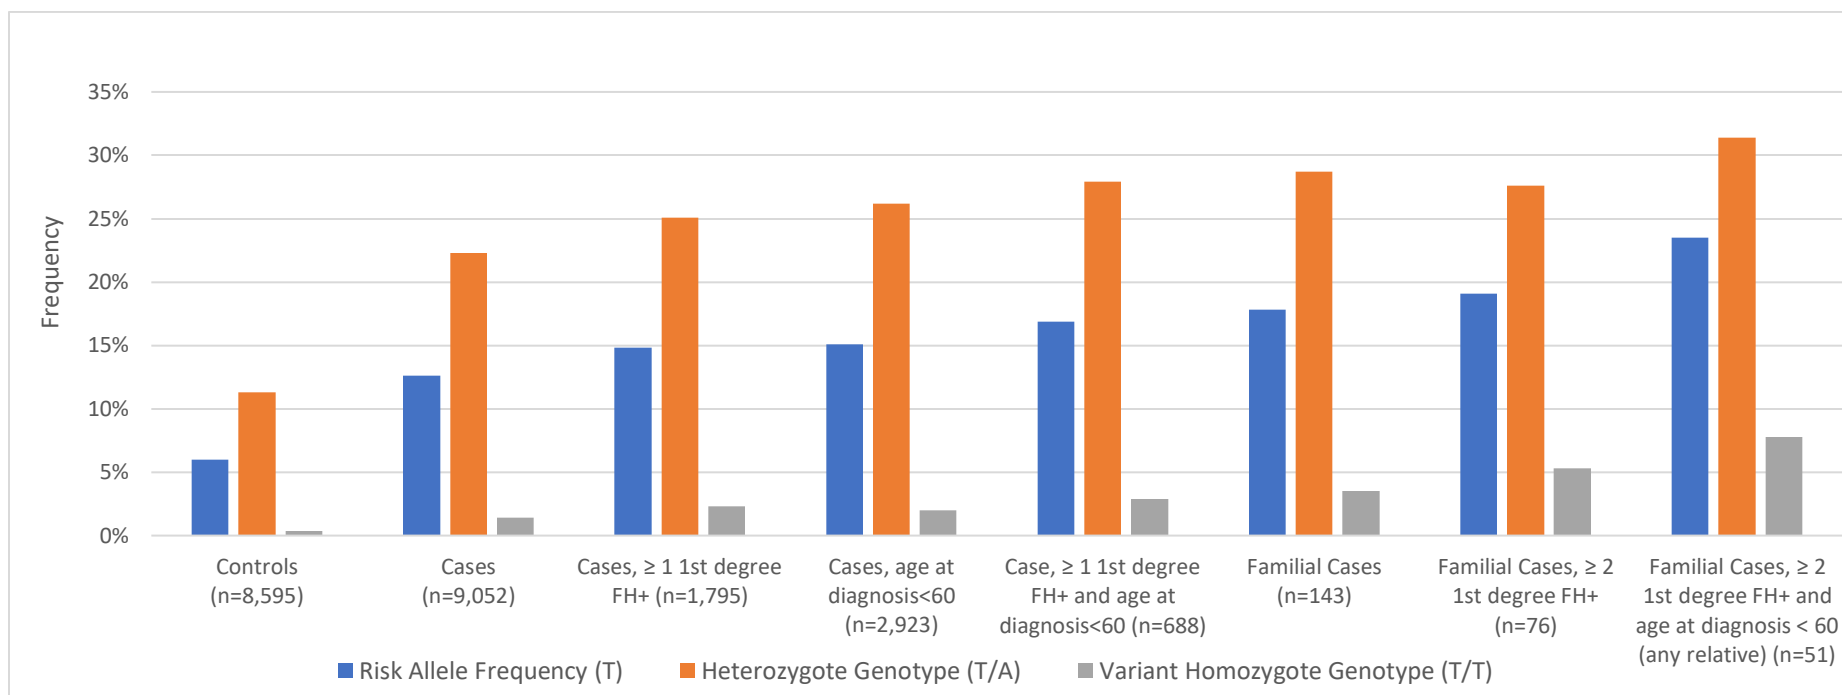

**Supplemental Figure 2.** Frequency of the T allele of rs72725854 by percentage of global African ancestry.

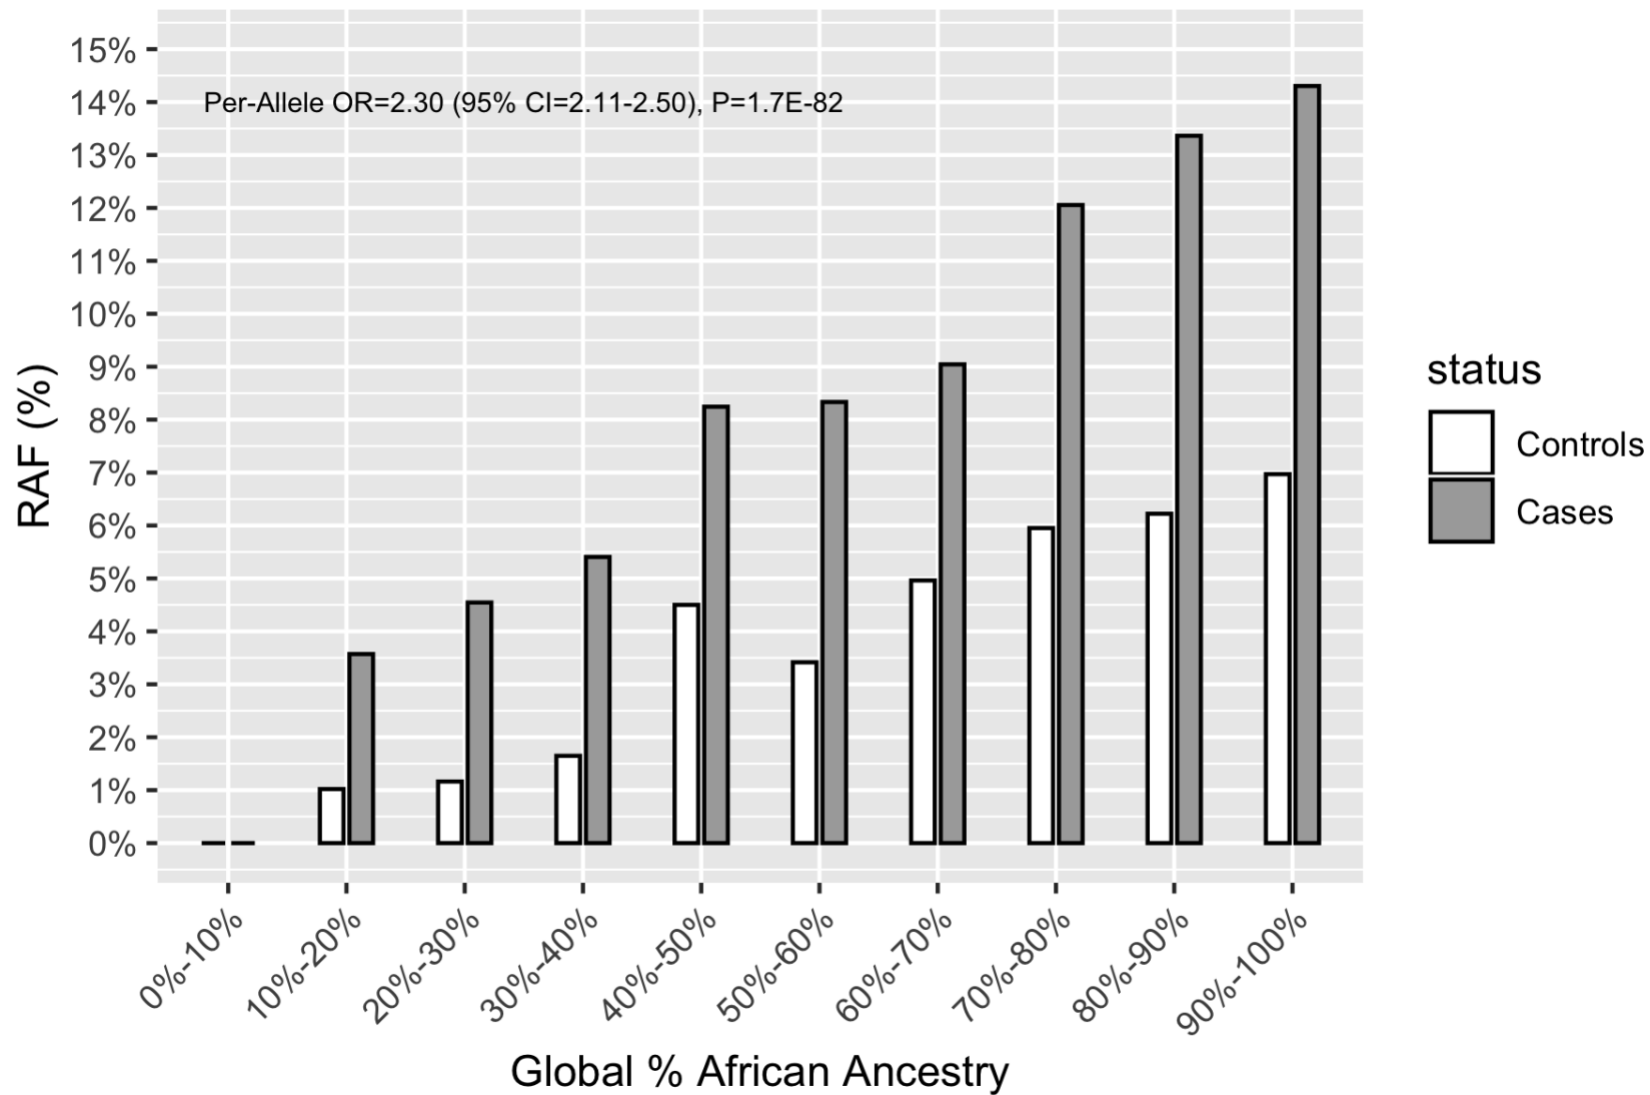

**Supplemental Figure 3. Genetic risk score (GRS) including and excluding rs72725854.**

**A. Full GRS**

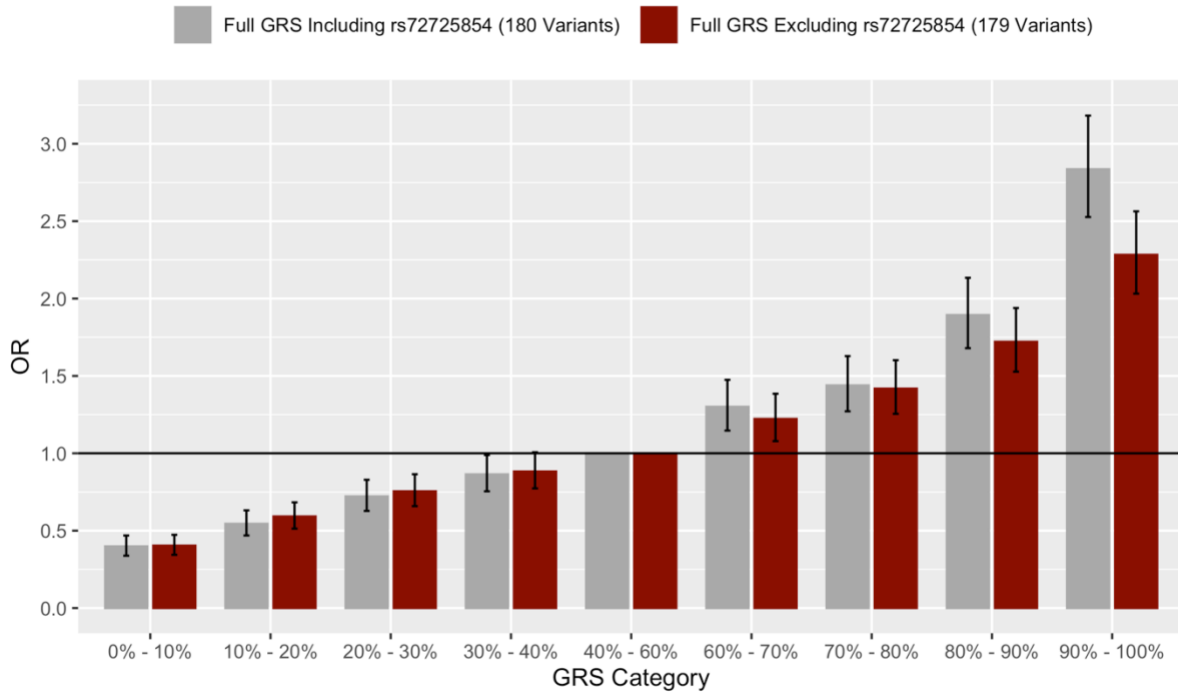

**B. 8q24 GRS**

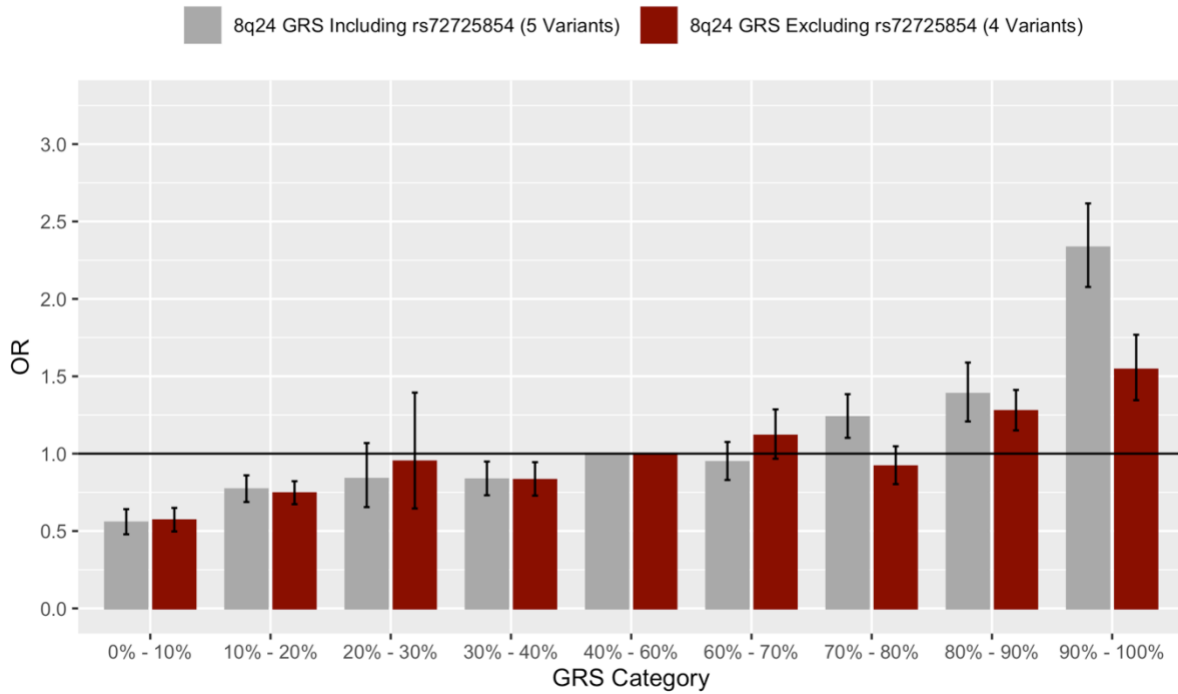



**Supplemental Table 1.** Description and study design of the studies included. \*

| Study Name                                                                      | Study Abbreviation | Group     | No. of Cases | No. of Controls | No. of Cases in analysis | No. of Controls in analysis | Design, location                           | Source of cases                                        | Source of controls                                                    | Study Reference |
|---------------------------------------------------------------------------------|--------------------|-----------|--------------|-----------------|--------------------------|-----------------------------|--------------------------------------------|--------------------------------------------------------|-----------------------------------------------------------------------|-----------------|
| Multiethnic Cohort, African Americans                                           | MEC                | AAPC GWAS | 1841         | 1758            | 1765                     | 1648                        | Case-control in cohort, HI and CA, U.S.    | MEC                                                    | MEC                                                                   | PMID: 10695593  |
| Southern Community Cohort Study                                                 | SCCS               | AAPC GWAS | 263          | 523             | 250                      | 513                         | Case-control in cohort, Southeastern U.S.  | SCCS                                                   | SCCS                                                                  | PMID: 16080667  |
| The Prostate, Lung, Colorectal, and Ovarian Cancer Screening Trial              | PLCO               | AAPC GWAS | 286          | 269             | 231                      | 240                         | Case-control in screening trial, U.S.      | PLCO                                                   | PLCO                                                                  | PMID: 11189683  |
| The Cancer Prevention Study II Nutrition Cohort                                 | CPS-II             | AAPC GWAS | 76           | 152             | 64                       | 112                         | Case-control in cohort, U.S.               | CPS-II                                                 | CPS-II                                                                | PMID: 12015775  |
| Prostate Cancer Case-Control Studies at MD Anderson                             | MDA                | AAPC GWAS | 543          | 474             | 527                      | 437                         | Case-control, Houston, TX, U.S.            | Houston Medical Center                                 | Random-digit-dialing or hospital visitors                             | PMID: 15264247  |
| Identifying Prostate Cancer Genes                                               | IPCG               | AAPC GWAS | 368          | 172             | 353                      | 157                         | Case-control, Maryland, U.S.               | Johns Hopkins Hospital and Sidney Kimmel Cancer Center | Men undergoing screening for prostate cancer at the same institutions | PMID: 17401366  |
| The Los Angeles Study of Aggressive Prostate Cancer                             | LAAPC              | AAPC GWAS | 296          | 303             | 286                      | 285                         | Case-control, Los Angeles County, CA, U.S. | Los Angeles County Cancer Surveillance Program         | Los Angeles County, neighborhood walk algorithm and the MEC           | PMID: 20364112  |
| Prostate Cancer Genetics Study                                                  | CaP Genes          | AAPC GWAS | 75           | 85              | 71                       | 85                          | Case-control, Cleveland, OH, U.S.          | Medical institutions in Cleveland, Ohio                | Screened men at same medical institutions                             | PMID: 16931544  |
| Case-Control Study of Prostate Cancer among African Americans in Washington, DC | DCPC               | AAPC GWAS | 292          | 359             | 263                      | 339                         | Case-control, Washington, DC, U.S.         | Howard University Hospital (HUH)                       | Men undergoing screening for prostate cancer at HUH                   | PMID: 19902474  |
| King County (Washington) Prostate Cancer Studies                                | KCPCS              | AAPC GWAS | 145          | 81              | 141                      | 75                          | Case-control, King County, WA, U.S.        | Seattle-Puget Sound SEER cancer registry               | Random-digit-dialing                                                  | PMID: 10548316  |
| The Gene-Environment Interaction in Prostate Cancer Study                       | GECAP              | AAPC GWAS | 234          | 92              | 224                      | 89                          | Case-control, Detroit, MI, U.S.            | The Henry Ford Health System (HFHS)                    | HFHS population base                                                  | PMID: 17067754  |

|                                                |              |                    |     |     |     |     |                                                                                                |                                                                                                                                                                                                                                                                                              |                                                                                                                                                                   |                                  |
|------------------------------------------------|--------------|--------------------|-----|-----|-----|-----|------------------------------------------------------------------------------------------------|----------------------------------------------------------------------------------------------------------------------------------------------------------------------------------------------------------------------------------------------------------------------------------------------|-------------------------------------------------------------------------------------------------------------------------------------------------------------------|----------------------------------|
| North Carolina Prostate Cancer Study           | NCPCS        | AAPC GWAS          | 216 | 249 | 203 | 231 | Case-control, NC, U.S.                                                                         | North Carolina Central Cancer Registry                                                                                                                                                                                                                                                       | Friend referral, same county                                                                                                                                      | PMID: 19117981                   |
| Selenium and Vitamin E Cancer Prevention Trial | SELECT       | AAPC GWAS          | 223 | 224 | 212 | 208 | Case-control in clinical trial, U.S.                                                           | SELECT                                                                                                                                                                                                                                                                                       | SELECT                                                                                                                                                            | PMID: 19066370                   |
| Prostate Cancer in a Black Population          | PCBP         | AAPC GWAS          | 238 | 231 | 231 | 223 | Case-control, Barbados                                                                         | All newly diagnosed cases in Barbados                                                                                                                                                                                                                                                        | Selected from a national database                                                                                                                                 | PMID: 22402288                   |
| Vanderbilt Bio VU                              | BioVU        | ELLIPSE/ OncoArray | 213 | 0   | 204 | 0   | Opt-out clinical biobank linked to de-identified electronic health records, Nashville, TN, USA | Patients who had an outpatient visit at VUMC with a blood draw ordered for clinical care who did not opt-out of the VUMC biobank (BioVU) and who were 18 years of age or older at the time his or her electronic health record was accessed for prostate cancer case status (in early 2014). | N/A (no matching controls)                                                                                                                                        | PMID: 18500243<br>PMID: 23424142 |
| Center for Prostate Disease Research           | CPDR         | ELLIPSE/ OncoArray | 145 | 44  | 134 | 41  | Retrospective cohort study; Greater Washington DC Metro Area, USA                              | Patients enrolled at Walter Reed National Military Medical Center with biopsy-confirmed prostate cancer who underwent radical prostatectomy                                                                                                                                                  | Patients enrolled at Walter Reed National Military Medical Center who had a negative DRE and PSA <2.0 ng/mL                                                       | PMID: 20056617                   |
| EPIde miology of Prostate CAncer               | EPICAP       | ELLIPSE/ OncoArray | 64  | 63  | 20  | 9   | Case-control, France                                                                           | North African origins living in the France Metropolitan, Cancer registry                                                                                                                                                                                                                     | Population-based                                                                                                                                                  | PMID: 24552491                   |
| Karuprostate                                   | Karuprostate | ELLIPSE/ OncoArray | 384 | 411 | 363 | 386 | Population-based case-control in Guadeloupe and hospital-based case-control in DR Congo        | Incident cases from Guadeloupe (Afro-Caribbean) and the DR Congo (African)                                                                                                                                                                                                                   | Free health screening program open to the general population (Guadeloupe); Men attending for prostate cancer screening or benign prostatic hyperplasia (DR Congo) | PMID: 20566993                   |
| Multiethnic Cohort Study                       | MEC          | ELLIPSE/ OncoArray | 489 | 529 | 462 | 499 | Case-control in cohort, HI and CA, U.S.                                                        | MEC                                                                                                                                                                                                                                                                                          | MEC                                                                                                                                                               | PMID: 10695593                   |
| Moffitt Prostate Cancer Study                  | MOFFITT      | ELLIPSE/ OncoArray | 106 | 93  | 100 | 91  | Case-control at Moffitt Cancer Center                                                          | Moffitt Cancer Center                                                                                                                                                                                                                                                                        | Non-cancer visitors                                                                                                                                               | PMID: 21802122                   |
| Nashville Men's Health Study                   | NMHS         | ELLIPSE/ OncoArray | 188 | 201 | 175 | 188 | Case-control, Nashville, TN                                                                    | Men seeking a prostate biopsy in all urology clinics in Nashville, TN                                                                                                                                                                                                                        | Men without PC at biopsy from these urology clinics.                                                                                                              | PMID: 23079532                   |

|                                                      |         |                       |      |      |     |      |                                                                    |                                                                                                                                                                                |                                                                                         |                                                                                                                                                                                                 |
|------------------------------------------------------|---------|-----------------------|------|------|-----|------|--------------------------------------------------------------------|--------------------------------------------------------------------------------------------------------------------------------------------------------------------------------|-----------------------------------------------------------------------------------------|-------------------------------------------------------------------------------------------------------------------------------------------------------------------------------------------------|
| Prostate Cancer Prevention Trial                     | PCPT    | ELLIPSE/<br>OncoArray | 44   | 129  | 43  | 113  | Case-control drawn from a randomized clinical trial; US and Canada | PCPT                                                                                                                                                                           | PCPT                                                                                    | PMID: 12824459                                                                                                                                                                                  |
| The North Carolina-Louisiana Prostate Cancer Project | PCaP    | ELLIPSE/<br>OncoArray | 1022 | 0    | 958 | 0    | Population-based Case-only                                         | North Carolina Central Cancer Registry for NC cases and LSUHSC Cancer (SEER) Registry for LA cases                                                                             | NA                                                                                      | PMID: 16676364                                                                                                                                                                                  |
| The Prostate Cancer and Environment Study            | PROtEuS | ELLIPSE/<br>OncoArray | 72   | 58   | 70  | 57   | Case-control, Montreal, Canada                                     | New incident cases across Montreal hospitals                                                                                                                                   | Electoral list, from same residential areas as cases                                    | PMID: 26385727                                                                                                                                                                                  |
| CerePP French Prostate Cancer Case-Control Study     | ProGene | ELLIPSE/<br>OncoArray | 107  | 105  | 101 | 85   | Case-control, France                                               | North Africa, Africa or Caribbean origins, living in France Metropolitan                                                                                                       | Controls were recruited as participating in a systematic health screening program       | PMID: 18264096                                                                                                                                                                                  |
| Southern Community Cohort Study                      | SCCS    | ELLIPSE/<br>OncoArray | 301  | 1557 | 286 | 1468 | Case-control in cohort, Southeastern U.S.                          | SCCS                                                                                                                                                                           | SCCS                                                                                    | PMID: 16080667                                                                                                                                                                                  |
| South Carolina Prostate Cancer Study                 | SCPCS   | ELLIPSE/<br>OncoArray | 64   | 39   | 57  | 32   | Case-control, South Carolina, U.S.                                 | South Carolina Central Cancer Registry                                                                                                                                         | Health Care Financing Administration Medicare Beneficiary File                          | PMID: 15280622                                                                                                                                                                                  |
| Selenium and Vitamin E Cancer Prevention Trial       | SELECT  | ELLIPSE/<br>OncoArray | 30   | 173  | 27  | 166  | Case-control in clinical trial, U.S.                               | SELECT                                                                                                                                                                         | SELECT                                                                                  | PMID: 19066370                                                                                                                                                                                  |
| San Francisco Prostate Cancer Study                  | SFPCS   | ELLIPSE/<br>OncoArray | 86   | 37   | 79  | 36   | Case-control in Bay Area, CA                                       | Non-Hispanic African-American men ages 40-79 years diagnosed with advanced prostate cancer from 1997-2000. Cases were identified through the Greater Bay Area Cancer Registry. | Non-Hispanic African-American men ages 40-79 years without a history of prostate cancer | PMID: 1595859]                                                                                                                                                                                  |
| A Case Control Study in Uganda                       | UGANDA  | ELLIPSE/<br>OncoArray | 571  | 485  | 560 | 480  | Case-control in Kampala, Uganda                                    | Incident cases from Mulago Hospital                                                                                                                                            | Patients in other clinics at Mulago                                                     | PMID: 29356057                                                                                                                                                                                  |
| UK Prostate Cancer Study                             | UKGPCS  | ELLIPSE/<br>OncoArray | 375  | 0    | 365 | 0    | Cases from the UK                                                  | Cases identified through clinics at the Royal Marsden hospital and nationwide NCRN hospitals                                                                                   | NA                                                                                      | <a href="http://www.icr.ac.uk/research/team_leaders/Eeles_Rosalind/Eeles_Rosalind_RES/index.shtml">http://www.icr.ac.uk/research/team_leaders/Eeles_Rosalind/Eeles_Rosalind_RES/index.shtml</a> |
| San Antonio Biomarkers of Risk                       | SABOR   | ELLIPSE/<br>OncoArray | 106  | 106  | 105 | 103  | Case-control from SA, TX                                           | Incident and Prevalent cases from SABOR                                                                                                                                        | SABOR                                                                                   | PMID: 20086112                                                                                                                                                                                  |

|                                                                                |          |                    |    |     |    |     |                                                                                               |                                                                                                            |                                              |                |
|--------------------------------------------------------------------------------|----------|--------------------|----|-----|----|-----|-----------------------------------------------------------------------------------------------|------------------------------------------------------------------------------------------------------------|----------------------------------------------|----------------|
| Wake Forest Prostate Cancer Study                                              | WFPCS    | ELLIPSE/ OncoArray | 59 | 66  | 54 | 47  | Case-control, Winston-Salem, NC                                                               | Incident cases from Wake Forest Baptist Health Urology Clinic                                              | Men with normal PSA/DRE from the same clinic | PMID: 15342424 |
| Washington University Prostate Cancer Study                                    | WUGS     | ELLIPSE/ OncoArray | 75 | 153 | 70 | 150 | Case Control from St. Louis MO                                                                | Incident and Prevalent cases from Barnes Jewish Hospital                                                   | St. Louis MO                                 | PMID: 21602798 |
| University of Michigan Prostate Cancer Genetics Project                        | UM-PCGP  | HRPCF              | -- | --  | 49 | 0   | Case-only, cases from high risk prostate cancer families in Michigan                          | Prostate cancer patients evaluated at the University of Michigan                                           | NA                                           | PMID: 14601029 |
| The International Consortium for Prostate Cancer Genetics (Johns Hopkins site) | ICPCG    | HRPCF              | -- | --  | 63 | 0   | Case-only, cases from high risk prostate cancer families throughout U.S.                      | Johns Hopkins cases recruited via urologist referrals and family history records at Johns Hopkins Hospital | NA                                           | PMID: 15988677 |
| Louisiana State University Health Sciences Center                              | LSUHSC   | HPC                | -- | --  | 20 | 0   | Case-only, hereditary prostate cancer families from LA, U.S.                                  | Hospitals and physicians in LA                                                                             | NA                                           | PMID: 18268528 |
| Prostate Cancer Genetic Research Study                                         | PROGRESS | HPC                | -- | --  | 11 | 0   | Case-only, hereditary prostate cancer families from North America and several other countries | Public advertising, urologists, prostate cancer support groups                                             | NA                                           | PMID: 14601027 |

\*AAPC GWAS = African Ancestry Prostate Cancer Genome-Wide Association Study; ELLIPSE = Elucidating Loci Involved in Prostate Cancer Susceptibility; HRPCF = High Risk Prostate Cancer Families; HPC = Hereditary Prostate Cancer; NA = not available; PMID = identifier number used in PubMed

**Supplemental Table 2. Study participant characteristics. \***

| Study        | Group              | #Ca in analysis | #Co in analysis | Median Age (IQR) in Ca | Median Age (IQR) in Co | FH+/FH- in Ca, n (%) | FH+/FH- in Co, n (%) | Low Risk, n (%) | Intermediate Risk, n (%) | High Risk, n (%) | Lethal, n (%) | RAF in Ca | RAF in Co | Median %Global AFR in Ca (IQR) | Median %Global AFR in Co (IQR) |
|--------------|--------------------|-----------------|-----------------|------------------------|------------------------|----------------------|----------------------|-----------------|--------------------------|------------------|---------------|-----------|-----------|--------------------------------|--------------------------------|
| MEC          | AAPC GWAS          | 1765            | 1648            | 67 (12)                | 69 (11)                | 328 (19) / 1296 (73) | 179 (11) / 1280 (78) | 341 (19)        | 730 (41)                 | 391 (22)         | 195 (11)      | 11.4%     | 5.1%      | 81 (17)                        | 80 (20)                        |
| SCCS         | AAPC GWAS          | 250             | 513             | 62 (9)                 | 59 (11)                | 20 (8) / 203 (81)    | 32 (6.2) / 422 (82)  | 75 (30)         | 90 (36)                  | 46 (18)          | 23 (9.2)      | 15.0%     | 5.9%      | 88 (9.8)                       | 88 (9.4)                       |
| PLCO         | AAPC GWAS          | 231             | 240             | 68 (9)                 | 63 (8.2)               | 19 (8.2) / 203 (88)  | 24 (10) / 210 (88)   | 115 (50)        | 56 (24)                  | 37 (16)          | 15 (6.5)      | 10.4%     | 8.5%      | 82 (13)                        | 83 (17)                        |
| CPS-II       | AAPC GWAS          | 64              | 112             | 70 (8)                 | 70 (9)                 | 5 (7.8) / 59 (92)    | 3 (2.7) / 109 (97)   | 24 (38)         | 15 (23)                  | 8 (12)           | 7 (11)        | 13.3%     | 5.8%      | 77 (21)                        | 74 (21)                        |
| MDA          | AAPC GWAS          | 527             | 437             | 60 (12)                | 58 (14)                | 132 (25) / 384 (73)  | 62 (14) / 372 (85)   | 113 (21)        | 183 (35)                 | 170 (32)         | 16 (3)        | 13.5%     | 6.8%      | 84 (13)                        | 85 (13)                        |
| IPCG         | AAPC GWAS          | 353             | 157             | 57 (10)                | 52 (22)                | 80 (23) / 206 (58)   | 3 (1.9) / 3 (1.9)    | 133 (38)        | 77 (22)                  | 122 (35)         | 0 (0)         | 15.0%     | 8.0%      | 82 (14)                        | 85 (12)                        |
| LAAPC        | AAPC GWAS          | 286             | 285             | 63 (12)                | 64 (11)                | 63 (22) / 223 (78)   | 24 (8.4) / 243 (85)  | 132 (46)        | 0 (0)                    | 114 (40)         | 22 (7.7)      | 11.5%     | 5.3%      | 82 (14)                        | 80 (20)                        |
| CaP Genes    | AAPC GWAS          | 71              | 85              | 67 (10)                | 66 (10)                | 16 (23) / 55 (77)    | 8 (9.4) / 77 (91)    | 0 (0)           | 35 (49)                  | 15 (21)          | 3 (4.2)       | 13.4%     | 7.6%      | 82 (12)                        | 86 (14)                        |
| DCPC         | AAPC GWAS          | 263             | 339             | 64 (14)                | 58 (14)                | 33 (13) / 122 (46)   | 27 (8) / 140 (41)    | 44 (17)         | 9 (3.4)                  | 23 (8.7)         | 24 (9.1)      | 13.5%     | 7.1%      | 86 (18)                        | 86 (19)                        |
| KCPCS        | AAPC GWAS          | 141             | 75              | 59 (10)                | 53 (9.5)               | 27 (19) / 114 (81)   | 8 (11) / 67 (89)     | 47 (33)         | 40 (28)                  | 32 (23)          | 6 (4.3)       | 16.0%     | 7.3%      | 82 (16)                        | 80 (14)                        |
| GECAP        | AAPC GWAS          | 224             | 89              | 62 (11)                | 62 (11)                | 50 (22) / 162 (72)   | 15 (17) / 69 (78)    | 78 (35)         | 69 (31)                  | 52 (23)          | 6 (2.7)       | 12.5%     | 3.9%      | 83 (12)                        | 84 (13)                        |
| NCPCS        | AAPC GWAS          | 203             | 231             | 61 (9)                 | 52 (14)                | 61 (30) / 142 (70)   | 5 (2.2) / 16 (6.9)   | 30 (15)         | 36 (18)                  | 19 (9.4)         | 0 (0)         | 12.8%     | 5.6%      | 84 (13)                        | 85 (13)                        |
| SELECT       | AAPC GWAS          | 212             | 208             | 64 (11)                | 64 (10)                | 60 (28) / 133 (63)   | 31 (15) / 161 (77)   | 109 (51)        | 47 (22)                  | 14 (6.6)         | 3 (1.4)       | 10.6%     | 5.5%      | 84 (14)                        | 80 (18)                        |
| PCBP         | AAPC GWAS          | 231             | 223             | 66 (14)                | 66 (13)                | 27 (12) / 135 (58)   | 15 (6.7) / 140 (63)  | 0 (0)           | 0 (0)                    | 0 (0)            | 11 (4.8)      | 10.6%     | 5.4%      | 91 (7.4)                       | 91 (9.9)                       |
| BioVU        | ELLIPSE/ OncoArray | 204             | 0               | 61 (11)                | --                     | 0 (0) / 0 (0)        | --                   | 1 (0.49)        | 54 (26)                  | 94 (46)          | 2 (0.98)      | 12.0%     | --        | 81 (17)                        | --                             |
| CPDR         | ELLIPSE/ OncoArray | 134             | 41              | 56 (11)                | 65 (2.9)               | 43 (32) / 69 (51)    | 4 (9.8) / 37 (90)    | 55 (41)         | 23 (17)                  | 35 (26)          | 0 (0)         | 13.4%     | 6.1%      | 82 (14)                        | 80 (18)                        |
| EPICAP       | ELLIPSE/ OncoArray | 20              | 9               | 65 (6.5)               | 62 (8)                 | 6 (30) / 13 (65)     | 0 (0) / 8 (89)       | 0 (0)           | 0 (0)                    | 1 (5)            | 3 (15)        | 7.5%      | 5.6%      | 21 (13)                        | 18 (6.5)                       |
| Karuprostate | ELLIPSE/ OncoArray | 363             | 386             | 67 (11)                | 60 (12)                | 140 (39) / 216 (60)  | 70 (18) / 309 (80)   | 110 (30)        | 127 (35)                 | 109 (30)         | 0 (0)         | 16.7%     | 9.2%      | 94 (19)                        | 93 (22)                        |
| MEC          | ELLIPSE/ OncoArray | 462             | 499             | 66 (12)                | 69 (10)                | 127 (27) / 295 (64)  | 38 (7.6) / 412 (83)  | 118 (26)        | 158 (34)                 | 110 (24)         | 40 (8.7)      | 11.0%     | 4.9%      | 80 (19)                        | 79 (21)                        |

|              |                       |     |      |         |          |                        |                         |          |          |          |          |       |      |          |         |
|--------------|-----------------------|-----|------|---------|----------|------------------------|-------------------------|----------|----------|----------|----------|-------|------|----------|---------|
| MOFFITT      | ELLIPSE/<br>OncoArray | 100 | 91   | 62 (11) | 56 (10)  | 30 (30) /<br>70 (70)   | 6 (6.6) /<br>83 (91)    | 49 (49)  | 34 (34)  | 13 (13)  | 1 (1)    | 15.0% | 8.2% | 85 (15)  | 86 (10) |
| NMHS         | ELLIPSE/<br>OncoArray | 175 | 188  | 64 (12) | 62 (10)  | 27 (15) /<br>148 (85)  | 32 (17) /<br>156 (83)   | 63 (36)  | 16 (9.1) | 24 (14)  | 1 (0.57) | 12.0% | 6.6% | 81 (14)  | 81 (14) |
| PCPT         | ELLIPSE/<br>OncoArray | 43  | 113  | 67 (7)  | 67 (7)   | 3 (7) /<br>40 (93)     | 17 (15) /<br>96 (85)    | 26 (60)  | 11 (26)  | 3 (7)    | 0 (0)    | 8.1%  | 2.2% | 78 (20)  | 78 (18) |
| PCaP         | ELLIPSE/<br>OncoArray | 958 | 0    | 62 (12) | --       | 239 (25) /<br>719 (75) | --                      | 446 (47) | 242 (25) | 94 (9.8) | 72 (7.5) | 12.3% | --   | 84 (14)  | --      |
| PROtEuS      | ELLIPSE/<br>OncoArray | 70  | 57   | 63 (9)  | 64 (10)  | 7 (10) /<br>63 (90)    | 7 (12) /<br>50 (88)     | 19 (27)  | 11 (16)  | 10 (14)  | 1 (1.4)  | 13.6% | 7.0% | 92 (12)  | 92 (17) |
| ProGene      | ELLIPSE/<br>OncoArray | 101 | 85   | 63 (11) | 62 (13)  | 13 (13) /<br>81 (80)   | 8 (9.4) /<br>77 (91)    | 38 (38)  | 33 (33)  | 27 (27)  | 3 (3)    | 8.4%  | 1.2% | 75 (80)  | 27 (78) |
| SCCS         | ELLIPSE/<br>OncoArray | 286 | 1468 | 58 (11) | 61 (14)  | 61 (21) /<br>202 (71)  | 95 (6.5) /<br>1276 (87) | 25 (8.7) | 90 (31)  | 47 (16)  | 16 (5.6) | 11.2% | 6.8% | 86 (12)  | 86 (11) |
| SCPCS        | ELLIPSE/<br>OncoArray | 57  | 32   | 71 (7)  | 68 (5.2) | 14 (25) /<br>43 (75)   | 6 (19) /<br>26 (81)     | 27 (47)  | 12 (21)  | 14 (25)  | 0 (0)    | 11.4% | 1.6% | 89 (15)  | 89 (10) |
| SELECT       | ELLIPSE/<br>OncoArray | 27  | 166  | 64 (11) | 60 (12)  | 6 (22) /<br>21 (78)    | 23 (14) /<br>139 (84)   | 9 (33)   | 9 (33)   | 2 (7.4)  | 0 (0)    | 24.1% | 5.1% | 84 (14)  | 82 (16) |
| SFPCS        | ELLIPSE/<br>OncoArray | 79  | 36   | 62 (11) | 62 (7.5) | 21 (27) /<br>58 (73)   | 6 (17) /<br>30 (83)     | 0 (0)    | 0 (0)    | 63 (80)  | 16 (20)  | 12.7% | 6.9% | 83 (13)  | 82 (12) |
| UGANDA       | ELLIPSE/<br>OncoArray | 560 | 480  | 70 (13) | 65 (10)  | 54 (9.6) /<br>351 (63) | 11 (2.3) /<br>437 (91)  | 43 (7.7) | 50 (8.9) | 229 (41) | 167 (30) | 14.1% | 5.7% | 99 (3)   | 99 (4)  |
| UKGPCS       | ELLIPSE/<br>OncoArray | 365 | 0    | 63 (11) | --       | 58 (16) /<br>212 (58)  | --                      | 93 (25)  | 59 (16)  | 80 (22)  | 16 (4.4) | 13.2% | --   | 94 (14)  | --      |
| SABOR        | ELLIPSE/<br>OncoArray | 105 | 103  | 63 (14) | 64 (15)  | 0 (0) /<br>0 (0)       | 0 (0) /<br>0 (0)        | 32 (31)  | 18 (17)  | 14 (14)  | 0 (0)    | 12.1% | 4.8% | 83 (13)  | 83 (12) |
| WFPCS        | ELLIPSE/<br>OncoArray | 54  | 47   | 60 (11) | 57 (13)  | 13 (24) /<br>40 (74)   | 2 (4.3) /<br>45 (96)    | 17 (31)  | 10 (19)  | 9 (17)   | 2 (3.7)  | 12.0% | 5.3% | 80 (15)  | 81 (13) |
| WUGS         | ELLIPSE/<br>OncoArray | 70  | 150  | 63 (14) | 69 (5)   | 12 (17) /<br>57 (81)   | 15 (10) /<br>135 (90)   | 3 (4.3)  | 6 (8.6)  | 20 (29)  | 21 (30)  | 14.3% | 3.0% | 84 (9.7) | 81 (15) |
| UM-PCGP      | HRCPCF                | 49  | 0    | 57 (9)  | --       | 49 (100) /<br>0 (0)    | --                      | --       | --       | --       | --       | 17.3% | --   | --       | --      |
| ICPCG        | HRCPCF                | 63  | 0    | 59 (12) | --       | 61 (97) /<br>1 (1.6)   | --                      | --       | --       | --       | --       | 15.9% | --   | --       | --      |
| LSUHSC       | HPC                   | 20  | 0    | 64 (11) | --       | 20 (100) /<br>0 (0)    | --                      | --       | --       | --       | --       | 25.0% | --   | --       | --      |
| PROGRES<br>S | HPC                   | 11  | 0    | 54 (6)  | --       | 11 (100) /<br>0 (0)    | --                      | --       | --       | --       | --       | 18.2% | --   | --       | --      |

\*AAPC GWAS = African Ancestry Prostate Cancer Genome-Wide Association Study; ELLIPSE = Elucidating Loci Involved in Prostate Cancer Susceptibility; HRCPCF = High Risk Prostate Cancer Families; HPC = Hereditary Prostate Cancer; IQR=Interquartile range; FH+/FH-=Family history positive/negative; RAF=Risk allele frequency

**Supplemental Table 3.** Prostate cancer risk associated with germline variant rs72725854 by disease aggressiveness.

| Group                                | n    | Risk Allele Frequency | Carrier Frequency | Homozygote Genotype Frequency | Heterozygote Genotype |                  |         | Homozygote Variant Genotype |                   |         |
|--------------------------------------|------|-----------------------|-------------------|-------------------------------|-----------------------|------------------|---------|-----------------------------|-------------------|---------|
|                                      |      |                       |                   |                               | Frequency             | OR (95% CI)      | P value | Frequency                   | OR (95% CI)       | P value |
| Controls (reference group)           | 8595 | 6.0%                  | 11.6%             | 88.3%                         | 11.3%                 |                  |         | 0.35%                       |                   |         |
| Cases with low-risk disease          | 2415 | 11.4%                 | 21.4%             | 78.6%                         | 20.0%                 | 1.97 (1.74-2.24) | 6.6E-26 | 1.4%                        | 4.84 (2.85-8.23)  | 5.6E-09 |
| Cases with intermediate-risk disease | 2350 | 13.0%                 | 24.6%             | 75.4%                         | 23.2%                 | 2.41 (2.13-2.73) | 1.5E-44 | 1.4%                        | 5.22 (3.06-8.89)  | 1.2E-09 |
| Cases with high-risk disease         | 2041 | 13.5%                 | 25.4%             | 74.6%                         | 23.8%                 | 2.45 (2.16-2.79) | 5.4E-42 | 1.6%                        | 4.90 (2.88-8.34)  | 4.4E-09 |
| Cases with lethal disease            | 692  | 13.8%                 | 26.0%             | 74.0%                         | 24.4%                 | 2.65 (2.18-3.24) | 4.8E-22 | 1.6%                        | 7.95 (3.79-16.72) | 4.4E-08 |

Low risk disease: Gleason<7, stage T1/T2, and PSA<10; Intermediate-risk disease: Gleason=7, stage T1/T2, and PSA=10–20 ng/ml;

High-risk disease: Gleason 8–10, stage T3/T4, PSA=20–100 ng/ml; Lethal disease: metastatic disease, PSA>100, or died of prostate cancer

**Supplemental Table 4.** Prostate cancer risk associated with germline variant rs72725854 and family history of prostate cancer.

| Group                             | #Controls | #Cases | OR (95% CI)        | P value |
|-----------------------------------|-----------|--------|--------------------|---------|
| Non-carrier FH- (reference group) | 5875      | 4747   |                    |         |
| Non-carrier FH+                   | 675       | 1304   | 2.15 (1.93–2.41)   | 6.8E-42 |
| Heterozygote carrier FH-          | 728       | 1316   | 2.25 (2.02–2.51)   | 2.9E-48 |
| Heterozygote carrier FH+          | 96        | 450    | 5.31 (4.19–6.73)   | 2.5E-43 |
| Homozygote carrier FH-            | 22        | 72     | 3.85 (2.29–6.50)   | 4.1E-07 |
| Homozygote carrier FH+            | 5         | 41     | 10.77 (4.15–27.95) | 1.1E-06 |

FH+: Participants with at least 1 first or second-degree relative with prostate cancer; FH-: Participants with no family history of prostate cancer

**Supplemental Table 5.** Absolute risk (AR) of prostate cancer based on the log-additive effects of rs72725854 and family history. Effects shown in Supplemental Table 3 are used to calculate AR.

| Group                             | #Controls | #Cases | AR at Age 60     |
|-----------------------------------|-----------|--------|------------------|
| Non-carrier FH- (reference group) | 5875      | 4747   | 4.3% (4.1%-4.5%) |
| Non-carrier FH+                   | 675       | 1304   | 9.0% (8.2%-9.8%) |
| Heterozygote carrier FH-          | 728       | 1316   | 9.0% (8.6%-10%)  |
| Heterozygote carrier FH+          | 96        | 450    | 21% (17%-25%)    |
| Homozygote carrier FH-            | 22        | 72     | 16% (8.7%-23%)   |
| Homozygote carrier FH+            | 5         | 41     | 38% (13%-65%)    |

FH+: Participants with at least 1 first or second-degree relative with prostate cancer; FH-: Participants with no family history of prostate cancer



**Supplemental Table 6.** Risk allele frequency of rs72725854 by African population. Study acronym is provided in parentheses or indicated in the footnote.

| African Population                                  | N     | Risk Allele Frequency |
|-----------------------------------------------------|-------|-----------------------|
| <b>Africa</b>                                       |       |                       |
| Botswana <sup>1</sup>                               | 71    | 8.5%                  |
| Ghana <sup>2</sup>                                  | 634   | 7.7%                  |
| <i>Uganda</i>                                       |       |                       |
| Kampala <sup>3</sup>                                | 480   | 5.7%                  |
| Northwest <sup>1</sup>                              | 197   | 4.1%                  |
| North-Central <sup>1</sup>                          |       |                       |
| <i>Langi</i>                                        | 233   | 3.7%                  |
| <i>Acholi</i>                                       | 81    | 2.5%                  |
| Democratic Republic of the Congo (FWI)              | 127   | 15.0%                 |
| Esan in Nigeria (ESN) <sup>4</sup>                  | 99    | 6.1%                  |
| Gambian in Western Division (GWD) <sup>4</sup>      | 113   | 11.1%                 |
| Luhya in Webuye, Kenya (LWK) <sup>4</sup>           | 99    | 10.1%                 |
| Mende in Sierra Leone (MSL) <sup>4</sup>            | 85    | 7.6%                  |
| Yaruba in Ibadan, Nigeria (YRI) <sup>4</sup>        | 108   | 9.7%                  |
| <b>North America</b>                                |       |                       |
| Montreal, Canada (PROtEuS)                          | 57    | 7.0%                  |
| <i>United States</i>                                |       |                       |
| Mid-Atlantic                                        | 198   | 7.6%                  |
| Southern/Southeastern                               | 2,570 | 6.5%                  |
| South-Central                                       | 542   | 6.4%                  |
| African Ancestry in Southwest US (ASW) <sup>4</sup> | 61    | 4.9%                  |
| Western                                             | 2,543 | 5.2%                  |
| Midwest                                             | 324   | 4.5%                  |
| <i>Caribbean Islands</i>                            |       |                       |
| Barbados (PCBP)                                     | 223   | 5.4%                  |
| African Caribbean in Barbados (ACB) <sup>4</sup>    | 96    | 6.2%                  |
| Guadeloupe (FWI)                                    | 259   | 6.4%                  |

Risk allele frequencies are calculated in controls, with the exception of Botswana and 1000 Genomes, which did not have PCa status. Studies included in the United States: WUGS, WFPCS, SABOR, SFPCS, SELECT, SCPCS, SCCS, PCPT, NMHS, MOFFITT, MEC, CPDR, SELECT, NCPCS, GECAP, KCPCS, DCPC, CaP Genes, LAAPC, IPCG, MDA, CPS-II, PLCO. Studies included in the Mid-Atlantic US: CPDR, DCPC, IPCG. Studies included in Southern/Southeastern US: WFPCS, SCPCS, SCCS, NMHS, MOFFITT, NCPCS. Studies included in South-Central US: SABOR, MDA. Studies included in Western US: SFPCS, MEC, KCPCS, LAAPC. Studies included in Midwest US: WUGS, GECAP, CaP Genes.

<sup>1</sup>Botswana and North-Central Uganda frequencies are based on Gouveia et al., MBE 2020[33].

<sup>2</sup>Ghana frequencies are based on data from Conti et al., JNCI 2017[1].

<sup>3</sup>Ugandans from Kampala are from a PSA-screened population, with all controls having PSA<4 ng/mL, which may contribute to the lower frequency in this population.

<sup>4</sup>Risk allele frequencies are based on 1000 Genomes[12].

**Supplemental Table 7.** Prostate cancer risk associated with four other known African-ancestry 8q24 germline variants by family history<sup>a</sup> of prostate cancer and age at diagnosis.

| SNP ID<br>(position/risk<br>allele/other allele) | Group                      | n    | RAF   | Carrier<br>Freq. | Homozygote<br>Genotype<br>Freq. | Heterozygote Genotype |                  |         | Homozygote Variant Genotype |             |                   |         |
|--------------------------------------------------|----------------------------|------|-------|------------------|---------------------------------|-----------------------|------------------|---------|-----------------------------|-------------|-------------------|---------|
|                                                  |                            |      |       |                  |                                 | Freq.                 | OR (95% CI)      | P value | Freq.                       | OR (95% CI) | P value           |         |
| rs7463326<br>(128027954/G/A)                     | Controls (reference group) | 8595 | 84.0% | 97.6%            | 2.4%                            | 27.2%                 |                  |         |                             | 70.4%       |                   |         |
|                                                  | Cases                      | 9052 | 87.0% | 98.2%            | 1.8%                            | 22.5%                 | 1.09 (0.88–1.36) | 0.4     |                             | 75.7%       | 1.40 (1.13–1.74)  | 2.0E-03 |
|                                                  | Cases FH+                  | 1795 | 86.8% | 98.3%            | 1.7%                            | 23.1%                 | 1.21 (0.81–1.82) | 0.4     |                             | 75.3%       | 1.55 (1.04–2.30)  | 0.03    |
|                                                  | Cases FH-                  | 6135 | 86.9% | 98.2%            | 1.8%                            | 22.6%                 | 1.07 (0.83–1.37) | 0.6     |                             | 75.6%       | 1.35 (1.06–1.73)  | 0.01    |
|                                                  | Cases Age Dx<60            | 2923 | 86.7% | 97.9%            | 2.1%                            | 22.3%                 | 0.91 (0.65–1.27) | 0.6     |                             | 75.6%       | 1.18 (0.85–1.64)  | 0.3     |
|                                                  | Cases Age Dx≥60            | 6129 | 87.1% | 98.4%            | 1.6%                            | 22.7%                 | 1.16 (0.89–1.51) | 0.3     |                             | 75.7%       | 1.51 (1.16–1.96)  | 2.2E-03 |
|                                                  | Cases FH+ & Age Dx<60      | 688  | 86.3% | 97.7%            | 2.3%                            | 22.7%                 | 0.83 (0.46–1.48) | 0.5     |                             | 75.0%       | 1.10 (0.63–1.93)  | 0.7     |
| rs72725879<br>(128103969/T/C)                    | Controls (reference group) | 8595 | 34.0% | 56.2%            | 43.8%                           | 44.4%                 |                  |         |                             | 11.8%       |                   |         |
|                                                  | Cases                      | 9052 | 42.1% | 66.3%            | 33.7%                           | 48.6%                 | 1.42 (1.33–1.52) | 2.9E-25 |                             | 17.8%       | 1.97 (1.79–2.17)  | 8.2E-45 |
|                                                  | Cases FH+                  | 1795 | 42.9% | 67.9%            | 32.1%                           | 50.0%                 | 1.55 (1.38–1.75) | 1.5E-13 |                             | 17.9%       | 2.09 (1.78–2.45)  | 1.4E-19 |
|                                                  | Cases FH-                  | 6135 | 41.9% | 65.8%            | 34.2%                           | 47.9%                 | 1.38 (1.28–1.48) | 1.7E-17 |                             | 17.9%       | 2.01 (1.81–2.23)  | 2.2E-39 |
|                                                  | Cases Age Dx<60            | 2923 | 44.1% | 68.8%            | 31.2%                           | 49.5%                 | 1.50 (1.35–1.67) | 2.3E-13 |                             | 19.3%       | 2.09 (1.81–2.42)  | 2.8E-23 |
|                                                  | Cases Age Dx≥60            | 6129 | 41.1% | 65.1%            | 34.9%                           | 48.1%                 | 1.39 (1.28–1.50) | 8.9E-17 |                             | 17.0%       | 1.94 (1.74–2.17)  | 4.7E-32 |
|                                                  | Cases FH+ & Age Dx<60      | 688  | 44.1% | 68.6%            | 31.4%                           | 49.0%                 | 1.53 (1.26–1.85) | 1.1E-05 |                             | 19.6%       | 2.10 (1.64–2.70)  | 5.0E-09 |
| rs7812894<br>(128520479/A/G)                     | Controls (reference group) | 8595 | 16.0% | 29.7%            | 70.3%                           | 27.2%                 |                  |         |                             | 2.4%        |                   |         |
|                                                  | Cases                      | 9052 | 18.1% | 32.9%            | 67.1%                           | 29.5%                 | 1.14 (1.06–1.22) | 1.8E-04 |                             | 3.4%        | 1.50 (1.25–1.80)  | 1.7E-05 |
|                                                  | Cases FH+                  | 1795 | 17.9% | 32.6%            | 67.4%                           | 29.6%                 | 1.14 (1.01–1.27) | 0.03    |                             | 3.1%        | 1.32 (0.97–1.81)  | 0.08    |
|                                                  | Cases FH-                  | 6135 | 18.3% | 33.1%            | 66.9%                           | 29.6%                 | 1.14 (1.06–1.23) | 4.1E-04 |                             | 3.5%        | 1.55 (1.27–1.90)  | 1.8E-05 |
|                                                  | Cases Age Dx<60            | 2923 | 19.0% | 34.4%            | 65.6%                           | 30.8%                 | 1.17 (1.06–1.31) | 3.1E-03 |                             | 3.6%        | 1.56 (1.18–2.05)  | 1.5E-03 |
|                                                  | Cases Age Dx≥60            | 6129 | 17.7% | 32.2%            | 67.8%                           | 28.9%                 | 1.11 (1.03–1.21) | 6.7E-03 |                             | 3.2%        | 1.51 (1.22–1.87)  | 1.6E-04 |
|                                                  | Cases FH+ & Age Dx<60      | 688  | 19.3% | 35.5%            | 64.5%                           | 32.4%                 | 1.28 (1.06–1.53) | 8.8E-03 |                             | 3.1%        | 1.41 (0.86–2.31)  | 0.17    |
| rs12549761<br>(128540776/C/G)                    | Controls (reference group) | 8595 | 95.2% | 99.7%            | 0.3%                            | 9.0%                  |                  |         |                             | 90.7%       |                   |         |
|                                                  | Cases                      | 9052 | 96.6% | 99.8%            | 0.2%                            | 6.3%                  | 1.04 (0.55–1.94) | 0.9     |                             | 93.5%       | 1.58 (0.86–2.89)  | 0.14    |
|                                                  | Cases FH+                  | 1795 | 96.8% | 99.9%            | 0.1%                            | 6.2%                  | 2.04 (0.46–9.13) | 0.4     |                             | 93.6%       | 3.24 (0.76–13.75) | 0.11    |
|                                                  | Cases FH-                  | 6135 | 96.6% | 99.7%            | 0.3%                            | 6.4%                  | 0.78 (0.40–1.51) | 0.5     |                             | 93.4%       | 1.23 (0.66–2.31)  | 0.5     |
|                                                  | Cases Age Dx<60            | 2923 | 96.8% | 99.9%            | 0.1%                            | 6.1%                  | 1.71 (0.45–6.45) | 0.4     |                             | 93.8%       | 2.50 (0.70–8.93)  | 0.16    |
|                                                  | Cases Age Dx≥60            | 6129 | 96.5% | 99.8%            | 0.2%                            | 6.4%                  | 0.87 (0.44–1.75) | 0.7     |                             | 93.3%       | 1.36 (0.69–2.66)  | 0.4     |
|                                                  | Cases FH+ & Age Dx<60      | 688  | 96.7% | 99.9%            | 0.1%                            | 6.3%                  | 0.38 (0.04–3.49) | 0.4     |                             | 93.6%       | 1.35 (0.16–11.54) | 0.8     |

<sup>a</sup>Family history in non-familial cases and controls includes first- or second-degree relatives with prostate cancer.

**Supplemental Table 8.** Association between genetic risk scores and prostate cancer by family history<sup>a</sup> of prostate cancer and age at diagnosis.

| Group                               | GRS        | Full GRS (180 SNPs) |      |                  |         | Full GRS Minus rs72725854 (179 SNPs) |      |                  |         | 8q24 GRS (5 AFR SNPs) |      |                  |         | 8q24 GRS Minus rs72725854 (4 AFR SNPs) |      |                  |         |
|-------------------------------------|------------|---------------------|------|------------------|---------|--------------------------------------|------|------------------|---------|-----------------------|------|------------------|---------|----------------------------------------|------|------------------|---------|
|                                     | Category   | nCo                 | nCa  | OR (95% CI)      | P       | nCo                                  | nCa  | OR (95% CI)      | P       | nCo                   | nCa  | OR (95% CI)      | P       | nCo                                    | nCa  | OR (95% CI)      | P       |
| Cases vs. Controls                  | 0% - 10%   | 861                 | 302  | 0.4 (0.34-0.47)  | 2.1E-28 | 861                                  | 326  | 0.4 (0.34-0.47)  | 7.4E-29 | 879                   | 469  | 0.55 (0.48-0.64) | 2.1E-15 | 918                                    | 556  | 0.57 (0.5-0.65)  | 1.1E-16 |
|                                     | 10% - 20%  | 859                 | 422  | 0.54 (0.47-0.63) | 1.1E-15 | 859                                  | 476  | 0.59 (0.51-0.68) | 6.5E-13 | 1502                  | 1166 | 0.77 (0.69-0.86) | 3.9E-06 | 1697                                   | 1410 | 0.74 (0.67-0.82) | 5.8E-09 |
|                                     | 20% - 30%  | 859                 | 569  | 0.72 (0.63-0.83) | 4.2E-06 | 859                                  | 617  | 0.75 (0.66-0.86) | 5.1E-05 | 198                   | 164  | 0.84 (0.65-1.07) | 0.15    | 64                                     | 66   | 0.95 (0.65-1.39) | 0.8     |
|                                     | 30% - 40%  | 859                 | 645  | 0.86 (0.75-0.99) | 0.03    | 859                                  | 692  | 0.88 (0.77-1.01) | 0.06    | 902                   | 705  | 0.83 (0.73-0.95) | 6.0E-03 | 759                                    | 685  | 0.83 (0.73-0.94) | 4.8E-03 |
|                                     | 40% - 60%  | 1719                | 1532 | REF              |         | 1719                                 | 1623 | REF              |         | 1707                  | 1720 | REF              |         | 2195                                   | 2453 | REF              |         |
|                                     | 60% - 70%  | 859                 | 996  | 1.3 (1.15-1.47)  | 4.2E-05 | 859                                  | 1002 | 1.22 (1.08-1.38) | 1.6E-03 | 857                   | 798  | 0.94 (0.83-1.08) | 0.4     | 581                                    | 692  | 1.12 (0.97-1.29) | 0.13    |
|                                     | 70% - 80%  | 859                 | 1104 | 1.44 (1.27-1.63) | 8.2E-09 | 859                                  | 1173 | 1.42 (1.26-1.6)  | 2.0E-08 | 1124                  | 1359 | 1.24 (1.1-1.38)  | 2.8E-04 | 665                                    | 659  | 0.92 (0.8-1.05)  | 0.2     |
|                                     | 80% - 90%  | 859                 | 1401 | 1.89 (1.68-2.13) | 1.6E-25 | 859                                  | 1380 | 1.72 (1.53-1.94) | 4.5E-19 | 604                   | 822  | 1.39 (1.21-1.59) | 3.1E-06 | 1217                                   | 1702 | 1.27 (1.15-1.41) | 3.4E-06 |
|                                     | 90% - 100% | 861                 | 2078 | 2.84 (2.53-3.18) | 2.9E-70 | 861                                  | 1760 | 2.28 (2.03-2.56) | 5.2E-44 | 822                   | 1846 | 2.33 (2.08-2.62) | 9.4E-47 | 499                                    | 829  | 1.54 (1.35-1.77) | 5.2E-10 |
| FH+ Cases vs. Controls              | 0% - 10%   | 861                 | 57   | 0.38 (0.28-0.53) | 6.9E-09 | 861                                  | 59   | 0.35 (0.25-0.48) | 5.3E-11 | 879                   | 83   | 0.48 (0.36-0.64) | 3.3E-07 | 918                                    | 104  | 0.49 (0.38-0.63) | 3.3E-08 |
|                                     | 10% - 20%  | 859                 | 59   | 0.39 (0.28-0.54) | 1.1E-08 | 859                                  | 73   | 0.42 (0.31-0.56) | 8.6E-09 | 1502                  | 207  | 0.68 (0.55-0.84) | 3.6E-04 | 1697                                   | 256  | 0.65 (0.54-0.78) | 4.7E-06 |
|                                     | 20% - 30%  | 859                 | 85   | 0.56 (0.42-0.75) | 7.5E-05 | 859                                  | 94   | 0.56 (0.43-0.74) | 3.9E-05 | 198                   | 28   | 0.83 (0.52-1.33) | 0.4     | 64                                     | 11   | 0.84 (0.4-1.76)  | 0.7     |
|                                     | 30% - 40%  | 859                 | 112  | 0.75 (0.58-0.98) | 0.04    | 859                                  | 131  | 0.82 (0.64-1.04) | 0.10    | 902                   | 140  | 0.87 (0.68-1.1)  | 0.2     | 759                                    | 138  | 0.83 (0.66-1.04) | 0.11    |
|                                     | 40% - 60%  | 1719                | 306  | REF              |         | 1719                                 | 332  | REF              |         | 1707                  | 333  | REF              |         | 2195                                   | 502  | REF              |         |
|                                     | 60% - 70%  | 859                 | 198  | 1.37 (1.1-1.71)  | 5.3E-03 | 859                                  | 214  | 1.25 (1-1.55)    | 0.045   | 857                   | 166  | 1.08 (0.86-1.35) | 0.5     | 581                                    | 140  | 1.2 (0.94-1.53)  | 0.14    |
|                                     | 70% - 80%  | 859                 | 213  | 1.6 (1.29-1.98)  | 2.1E-05 | 859                                  | 222  | 1.37 (1.11-1.7)  | 3.3E-03 | 1124                  | 268  | 1.26 (1.03-1.55) | 0.02    | 665                                    | 155  | 1.11 (0.89-1.39) | 0.3     |
|                                     | 80% - 90%  | 859                 | 306  | 2.2 (1.8-2.7)    | 2.9E-14 | 859                                  | 282  | 1.8 (1.47-2.2)   | 1.1E-08 | 604                   | 162  | 1.44 (1.14-1.82) | 2.4E-03 | 1217                                   | 339  | 1.23 (1.03-1.47) | 0.02    |
|                                     | 90% - 100% | 861                 | 458  | 3.34 (2.77-4.04) | 9.5E-36 | 861                                  | 387  | 2.47 (2.04-2.98) | 1.2E-20 | 822                   | 407  | 2.71 (2.24-3.27) | 5.3E-25 | 499                                    | 150  | 1.43 (1.14-1.8)  | 2.4E-03 |
| FH- Cases vs. Controls              | 0% - 10%   | 861                 | 207  | 0.39 (0.33-0.47) | 8.2E-23 | 861                                  | 227  | 0.41 (0.34-0.49) | 4.4E-22 | 879                   | 334  | 0.58 (0.49-0.68) | 3.6E-11 | 918                                    | 389  | 0.59 (0.5-0.68)  | 3.7E-12 |
|                                     | 10% - 20%  | 859                 | 306  | 0.55 (0.47-0.65) | 3.1E-12 | 859                                  | 340  | 0.62 (0.53-0.72) | 3.5E-09 | 1502                  | 821  | 0.8 (0.71-0.9)   | 3.8E-04 | 1697                                   | 982  | 0.77 (0.69-0.86) | 3.7E-06 |
|                                     | 20% - 30%  | 859                 | 423  | 0.77 (0.66-0.9)  | 9.6E-04 | 859                                  | 454  | 0.8 (0.69-0.93)  | 4.6E-03 | 198                   | 104  | 0.82 (0.62-1.08) | 0.15    | 64                                     | 49   | 1.02 (0.67-1.56) | 0.9     |
|                                     | 30% - 40%  | 859                 | 457  | 0.89 (0.77-1.04) | 0.13    | 859                                  | 477  | 0.91 (0.78-1.05) | 0.2     | 902                   | 480  | 0.81 (0.7-0.94)  | 5.6E-03 | 759                                    | 450  | 0.81 (0.7-0.93)  | 4.0E-03 |
|                                     | 40% - 60%  | 1719                | 1048 | REF              |         | 1719                                 | 1105 | REF              |         | 1707                  | 1165 | REF              |         | 2195                                   | 1644 | REF              |         |
|                                     | 60% - 70%  | 859                 | 657  | 1.25 (1.08-1.43) | 2.0E-03 | 859                                  | 650  | 1.19 (1.03-1.37) | 0.02    | 857                   | 540  | 0.92 (0.8-1.06)  | 0.3     | 581                                    | 464  | 1.15 (0.99-1.35) | 0.08    |
|                                     | 70% - 80%  | 859                 | 755  | 1.42 (1.23-1.62) | 7.1E-07 | 859                                  | 783  | 1.4 (1.22-1.61)  | 1.1E-06 | 1124                  | 916  | 1.26 (1.11-1.43) | 3.6E-04 | 665                                    | 429  | 0.84 (0.72-0.98) | 0.02    |
|                                     | 80% - 90%  | 859                 | 908  | 1.81 (1.59-2.07) | 1.8E-18 | 859                                  | 919  | 1.73 (1.52-1.98) | 3.1E-16 | 604                   | 550  | 1.35 (1.16-1.58) | 9.3E-05 | 1217                                   | 1137 | 1.3 (1.16-1.46)  | 5.5E-06 |
|                                     | 90% - 100% | 861                 | 1372 | 2.74 (2.41-3.11) | 8.5E-55 | 861                                  | 1178 | 2.29 (2.02-2.61) | 5.4E-37 | 822                   | 1224 | 2.28 (2.01-2.58) | 4.7E-37 | 499                                    | 591  | 1.63 (1.4-1.89)  | 1.5E-10 |
| Age Dx <60 Cases vs. Controls       | 0% - 10%   | 861                 | 75   | 0.35 (0.26-0.49) | 1.2E-10 | 861                                  | 77   | 0.35 (0.25-0.47) | 2.6E-11 | 879                   | 142  | 0.59 (0.45-0.76) | 4.7E-05 | 918                                    | 179  | 0.61 (0.49-0.77) | 2.1E-05 |
|                                     | 10% - 20%  | 859                 | 90   | 0.47 (0.35-0.63) | 3.8E-07 | 859                                  | 117  | 0.54 (0.41-0.7)  | 4.4E-06 | 1502                  | 331  | 0.71 (0.58-0.86) | 5.9E-04 | 1697                                   | 410  | 0.68 (0.57-0.8)  | 7.2E-06 |
|                                     | 20% - 30%  | 859                 | 155  | 0.78 (0.61-1)    | 0.047   | 859                                  | 182  | 0.86 (0.68-1.08) | 0.2     | 198                   | 43   | 0.73 (0.46-1.15) | 0.17    | 64                                     | 22   | 0.84 (0.44-1.59) | 0.6     |
|                                     | 30% - 40%  | 859                 | 183  | 0.85 (0.67-1.08) | 0.19    | 859                                  | 197  | 0.88 (0.7-1.1)   | 0.3     | 902                   | 213  | 0.83 (0.67-1.04) | 0.11    | 759                                    | 203  | 0.71 (0.57-0.88) | 2.3E-03 |
|                                     | 40% - 60%  | 1719                | 445  | REF              |         | 1719                                 | 481  | REF              |         | 1707                  | 515  | REF              |         | 2195                                   | 796  | REF              |         |
|                                     | 60% - 70%  | 859                 | 319  | 1.39 (1.13-1.72) | 1.9E-03 | 859                                  | 328  | 1.24 (1.01-1.52) | 0.04    | 857                   | 233  | 0.9 (0.72-1.13)  | 0.4     | 581                                    | 223  | 0.99 (0.78-1.26) | 0.9     |
|                                     | 70% - 80%  | 859                 | 349  | 1.35 (1.09-1.66) | 5.1E-03 | 859                                  | 382  | 1.47 (1.2-1.8)   | 1.8E-04 | 1124                  | 436  | 1.23 (1.02-1.49) | 0.03    | 665                                    | 202  | 0.92 (0.73-1.14) | 0.4     |
|                                     | 80% - 90%  | 859                 | 474  | 2 (1.64-2.43)    | 3.0E-12 | 859                                  | 473  | 1.86 (1.53-2.25) | 3.1E-10 | 604                   | 281  | 1.41 (1.13-1.76) | 2.3E-03 | 1217                                   | 595  | 1.29 (1.1-1.52)  | 1.9E-03 |
|                                     | 90% - 100% | 861                 | 832  | 3.18 (2.66-3.8)  | 2.9E-37 | 861                                  | 684  | 2.37 (1.98-2.84) | 5.5E-21 | 822                   | 728  | 2.77 (2.31-3.31) | 1.3E-28 | 499                                    | 293  | 1.56 (1.26-1.93) | 3.4E-05 |
| Age Dx ≥60 Cases vs. Controls       | 0% - 10%   | 861                 | 227  | 0.4 (0.33-0.49)  | 1.7E-21 | 861                                  | 249  | 0.41 (0.34-0.49) | 7.8E-22 | 879                   | 327  | 0.54 (0.46-0.64) | 1.3E-12 | 918                                    | 377  | 0.56 (0.48-0.65) | 3.2E-13 |
|                                     | 10% - 20%  | 859                 | 332  | 0.56 (0.48-0.67) | 3.8E-11 | 859                                  | 359  | 0.59 (0.5-0.7)   | 5.8E-10 | 1502                  | 835  | 0.78 (0.69-0.89) | 2.3E-04 | 1697                                   | 1000 | 0.78 (0.69-0.87) | 1.6E-05 |
|                                     | 20% - 30%  | 859                 | 414  | 0.71 (0.6-0.83)  | 2.5E-05 | 859                                  | 435  | 0.71 (0.61-0.83) | 2.6E-05 | 198                   | 121  | 0.87 (0.65-1.15) | 0.3     | 64                                     | 44   | 0.96 (0.61-1.51) | 0.9     |
|                                     | 30% - 40%  | 859                 | 462  | 0.86 (0.74-1.01) | 0.06    | 859                                  | 495  | 0.88 (0.75-1.02) | 0.09    | 902                   | 492  | 0.82 (0.7-0.95)  | 9.0E-03 | 759                                    | 482  | 0.88 (0.76-1.02) | 0.10    |
|                                     | 40% - 60%  | 1719                | 1087 | REF              |         | 1719                                 | 1142 | REF              |         | 1707                  | 1205 | REF              |         | 2195                                   | 1657 | REF              |         |
|                                     | 60% - 70%  | 859                 | 677  | 1.28 (1.11-1.48) | 9.4E-04 | 859                                  | 674  | 1.2 (1.04-1.39)  | 0.02    | 857                   | 565  | 0.95 (0.82-1.1)  | 0.5     | 581                                    | 469  | 1.22 (1.04-1.44) | 0.02    |
|                                     | 70% - 80%  | 859                 | 755  | 1.46 (1.27-1.69) | 1.9E-07 | 859                                  | 791  | 1.37 (1.19-1.57) | 1.6E-05 | 1124                  | 923  | 1.26 (1.1-1.43)  | 6.6E-04 | 665                                    | 457  | 0.9 (0.77-1.05)  | 0.2     |
|                                     | 80% - 90%  | 859                 | 927  | 1.89 (1.64-2.17) | 3.0E-19 | 859                                  | 907  | 1.7 (1.48-1.95)  | 5.9E-14 | 604                   | 541  | 1.4 (1.19-1.64)  | 3.6E-05 | 1217                                   | 1107 | 1.29 (1.14-1.45) | 3.0E-05 |
|                                     | 90% - 100% | 861                 | 1246 | 2.61 (2.28-2.98) | 6.3E-45 | 861                                  | 1076 | 2.17 (1.89-2.48) | 2.8E-29 | 822                   | 1118 | 2.12 (1.86-2.42) | 2.3E-28 | 499                                    | 536  | 1.6 (1.37-1.88)  | 4.9E-09 |
| FH+ & Age Dx <60 Cases vs. Controls | 0% - 10%   | 861                 | 17   | 0.32 (0.18-0.58) | 1.9E-04 | 861                                  | 19   | 0.33 (0.19-0.58) | 8.8E-05 | 879                   | 29   | 0.49 (0.3-0.79)  | 3.4E-03 | 918                                    | 39   | 0.59 (0.39-0.89) | 0.01    |
|                                     | 10% - 20%  | 859                 | 11   | 0.21 (0.1-0.43)  | 3.1E-05 | 859                                  | 13   | 0.18 (0.08-0.38) | 7.4E-06 | 1502                  | 70   | 0.56 (0.39-0.81) | 2.3E-03 | 1697                                   | 94   | 0.66 (0.49-0.91) | 9.6E-03 |
|                                     | 20% - 30%  | 859                 | 26   | 0.55 (0.33-0.91) | 0.19    | 859                                  | 37   | 0.63 (0.4-1)     | 0.05    | 198                   | 9    | 1.01 (0.48-2.14) | 0.98    | 64                                     | 5    | 1.16 (0.4-3.38)  | 0.8     |
|                                     | 30% - 40%  | 859                 | 42   | 0.79 (0.51-1.22) | 0.3     | 859                                  | 47   | 0.76 (0.5-1.15)  | 0.2     | 902                   | 53   | 0.84 (0.56-1.26) | 0.4     | 759                                    | 52   | 0.8 (0.54-1.18)  | 0.3     |
|                                     | 40% - 60%  | 1719                | 115  | REF              |         | 1719                                 | 122  | REF              |         | 1707                  | 120  | REF              |         | 2195                                   | 187  | REF              |         |
|                                     | 60% - 70%  | 859                 | 74   | 1.47 (1.02-2.12) | 0.04    | 859                                  | 87   | 1.21 (0.85-1.72) | 0.3     | 857                   | 54   | 0.93 (0.63-1.38) | 0.7     | 581                                    | 43   | 0.85 (0.54-1.34) | 0.5     |
|                                     | 70% - 80%  | 859                 | 76   | 1.4 (0.97-2.03)  | 0.07    | 859                                  | 75   | 1.23 (0.86-1.75) | 0.3     | 1124                  | 108  | 1.28 (0.92-1.78) | 0.15    | 665                                    | 61   | 1.24 (0.86-1.79) | 0.2     |
|                                     | 80% - 90%  | 859                 | 120  | 2.13 (1.52-2.97) | 9.1E-06 | 859                                  | 111  | 1.8 (1.3-2.5)    | 4.6E-04 | 604                   | 68   | 1.45 (0.98-2.13) | 0.06    | 1217                                   | 142  | 1.35 (1.01-1.79) | 0.04    |
|                                     | 90% - 100% | 861                 | 207  | 3.27 (2.41-4.42) | 1.6E-14 | 861                                  | 176  | 2.38 (1.76-3.21) | 1.4E-08 | 822                   | 177  | 2.69 (1.98-3.64) | 2.2E-10 | 499                                    | 65   | 1.72 (1.2-2.47)  | 2.9E-03 |

<sup>a</sup>Family history in non-familial cases and controls includes first- or second-degree relatives with prostate cancer.

**Supplemental Table 9.** Proportion of familial relative risk (FRR) explained by known PCa variants in men of African ancestry.

| Genetic Loci                          | Proportion FRR (RR=2.0) | Proportion FRR (RR=2.5) | % of Total FRR |
|---------------------------------------|-------------------------|-------------------------|----------------|
| rs72725854 at 8q24                    | 12%                     | 9.2%                    | 32%            |
| 5 8q24 African Ancestry Variants      | 18%                     | 14%                     | 49%            |
| 14 Known 8q24 Variants*               | 21%                     | 16%                     | 57%            |
| Remaining 166 (non-8q24) PCa Variants | 16%                     | 12%                     | 43%            |
| Total 180 Known PCa Variants          | 38%                     | 29%                     | 100%           |

\* Includes 12 8q24 variants associated with PCa in men of European ancestry, 3 of which are also associated with PCa in men of African ancestry, and 2 additional variants only associated with PCa in men of African ancestry.

**Supplemental Table 10.** Proportion of familial relative risk (FRR) explained by each of 180 known PCa variants in men of African ancestry.

| Chr | Position     | rsid        | Prop FRR (RR=2.0) | Prop FRR (RR=2.5) | % of Total FRR |
|-----|--------------|-------------|-------------------|-------------------|----------------|
| 8   | 128074815 †  | rs72725854  | 12%               | 9.2%              | 32%            |
| 8   | 128103969 †‡ | rs72725879  | 4.4%              | 3.3%              | 12%            |
| 11  | 69002342     | rs11228580  | 1.8%              | 1.4%              | 4.8%           |
| 8   | 128103979 ¥  | rs5013678   | 0.97%             | 0.73%             | 2.6%           |
| 6   | 117199790    | rs630045    | 0.94%             | 0.71%             | 2.5%           |
| 13  | 110360784    | rs75823044  | 0.85%             | 0.64%             | 2.3%           |
| 8   | 128413305 ¥  | rs6983267   | 0.80%             | 0.60%             | 2.1%           |
| 22  | 28374943     | rs78554043  | 0.78%             | 0.59%             | 2.1%           |
| 8   | 128027954 †  | rs7463326   | 0.72%             | 0.55%             | 1.9%           |
| 8   | 128021752 ¥  | rs1487240   | 0.70%             | 0.53%             | 1.9%           |
| 8   | 23525358     | rs11782388  | 0.64%             | 0.48%             | 1.7%           |
| 8   | 128520479 †‡ | rs7812894   | 0.58%             | 0.44%             | 1.6%           |
| 2   | 63277843     | rs58235267  | 0.56%             | 0.43%             | 1.5%           |
| 8   | 128540776 †‡ | rs12549761  | 0.53%             | 0.40%             | 1.4%           |
| 6   | 160581543    | rs4646284   | 0.51%             | 0.38%             | 1.3%           |
| 22  | 43500212     | rs5759167   | 0.44%             | 0.33%             | 1.2%           |
| 5   | 1889346      | rs199577062 | 0.42%             | 0.31%             | 1.1%           |
| 11  | 68980335     | rs4620729   | 0.38%             | 0.29%             | 1.0%           |
| 10  | 51549496     | rs10993994  | 0.37%             | 0.28%             | 0.99%          |
| 6   | 76495882     | rs9443189   | 0.36%             | 0.27%             | 0.95%          |
| 17  | 47398244     |             | 0.34%             | 0.26%             | 0.91%          |
| 4   | 106064626    |             | 0.33%             | 0.25%             | 0.87%          |
| 3   | 87172632     | rs7642887   | 0.33%             | 0.25%             | 0.87%          |
| 8   | 128342866 ¥  | rs17464492  | 0.32%             | 0.24%             | 0.85%          |
| 7   | 27975919     | rs67152137  | 0.29%             | 0.22%             | 0.78%          |
| 8   | 127910317 ¥  | rs1914295   | 0.28%             | 0.21%             | 0.75%          |
| 19  | 51361382     | rs61752561  | 0.27%             | 0.20%             | 0.71%          |
| 2   | 85767735     | rs2028900   | 0.26%             | 0.20%             | 0.70%          |
| 11  | 2233574      | rs7127900   | 0.26%             | 0.20%             | 0.69%          |
| 9   | 110145833    |             | 0.26%             | 0.19%             | 0.68%          |
| X   | 51245276     | rs11338635  | 0.24%             | 0.18%             | 0.63%          |
| 5   | 1291331      | rs11414507  | 0.22%             | 0.17%             | 0.60%          |
| 2   | 20878820     | rs7255      | 0.22%             | 0.16%             | 0.57%          |
| 10  | 126650696    | rs11245446  | 0.20%             | 0.15%             | 0.53%          |
| 5   | 1284135      | rs4449583   | 0.19%             | 0.14%             | 0.50%          |
| 12  | 133067989    | rs7295014   | 0.15%             | 0.11%             | 0.40%          |
| 19  | 38735804     | rs11667256  | 0.14%             | 0.11%             | 0.37%          |
| 5   | 1285974      | rs7705526   | 0.14%             | 0.10%             | 0.36%          |
| 11  | 113700546    | rs56969947  | 0.13%             | 0.10%             | 0.36%          |
| 18  | 60961193     | rs11381388  | 0.13%             | 0.10%             | 0.35%          |
| 7   | 47486259     | rs145961284 | 0.13%             | 0.09%             | 0.33%          |
| 3   | 170083629    | rs61436251  | 0.12%             | 0.09%             | 0.33%          |
| 17  | 618039       | rs2474694   | 0.12%             | 0.09%             | 0.33%          |
| 1   | 150772613    | rs1811698   | 0.12%             | 0.09%             | 0.33%          |
| 13  | 73714290     | rs7996468   | 0.12%             | 0.09%             | 0.33%          |
| 17  | 36099952     | rs10908278  | 0.12%             | 0.09%             | 0.32%          |
| 2   | 242151791    | rs62187431  | 0.12%             | 0.09%             | 0.31%          |
| 1   | 88210715     | rs56391074  | 0.12%             | 0.09%             | 0.31%          |
| 20  | 62374389     | rs1058319   | 0.10%             | 0.08%             | 0.28%          |
| 12  | 14416918     | rs10845938  | 0.10%             | 0.08%             | 0.27%          |
| 11  | 102396607    | rs12285347  | 0.10%             | 0.08%             | 0.27%          |
| 2   | 173318244    | rs114161133 | 0.10%             | 0.07%             | 0.26%          |
| 7   | 1944537      |             | 0.09%             | 0.07%             | 0.24%          |
| 4   | 95544718     | rs6853490   | 0.08%             | 0.06%             | 0.23%          |
| 2   | 174234547    | rs34925593  | 0.08%             | 0.06%             | 0.22%          |
| 17  | 7803118      | rs28441558  | 0.08%             | 0.06%             | 0.22%          |
| 6   | 41525739     | rs10947980  | 0.08%             | 0.06%             | 0.21%          |
| 19  | 51360840     | rs62113212  | 0.08%             | 0.06%             | 0.21%          |
| 12  | 114666202    | rs10774740  | 0.07%             | 0.06%             | 0.19%          |
| 3   | 170074374    | rs57508070  | 0.07%             | 0.06%             | 0.19%          |
| 14  | 69126744     | rs7141529   | 0.07%             | 0.06%             | 0.19%          |

|    |           |             |       |       |       |
|----|-----------|-------------|-------|-------|-------|
| 12 | 53268073  | rs147181250 | 0.07% | 0.05% | 0.19% |
| X  | 9807589   | rs4830660   | 0.07% | 0.05% | 0.19% |
| 12 | 12871099  | rs2066827   | 0.07% | 0.05% | 0.17% |
| 19 | 41985587  | rs11672691  | 0.07% | 0.05% | 0.17% |
| 20 | 49509184  | rs17790938  | 0.06% | 0.05% | 0.17% |
| 12 | 49676010  | rs10875943  | 0.06% | 0.05% | 0.17% |
| 1  | 154980351 | rs56103503  | 0.06% | 0.05% | 0.17% |
| 6  | 11217897  | rs2018336   | 0.06% | 0.05% | 0.16% |
| 5  | 44328731  | rs10055386  | 0.06% | 0.05% | 0.16% |
| 7  | 20994491  | rs12155172  | 0.06% | 0.04% | 0.15% |
| 11 | 61908440  | rs2277283   | 0.06% | 0.04% | 0.15% |
| 3  | 113277105 | rs7639565   | 0.05% | 0.04% | 0.13% |
| 9  | 34049779  | rs10122495  | 0.05% | 0.03% | 0.12% |
| 17 | 69104938  | rs7222314   | 0.04% | 0.03% | 0.12% |
| 16 | 82178893  | rs199737822 | 0.04% | 0.03% | 0.11% |
| 6  | 153430305 |             | 0.04% | 0.03% | 0.10% |
| 8  | 25892142  | rs11135910  | 0.04% | 0.03% | 0.10% |
| 14 | 37138294  | rs11629412  | 0.04% | 0.03% | 0.10% |
| 6  | 160181878 | rs2342478   | 0.04% | 0.03% | 0.10% |
| 1  | 153899900 | rs34579442  | 0.04% | 0.03% | 0.10% |
| 17 | 36074979  | rs11649743  | 0.04% | 0.03% | 0.10% |
| 12 | 90160530  | rs5799921   | 0.04% | 0.03% | 0.09% |
| 6  | 30098259  |             | 0.03% | 0.03% | 0.09% |
| 5  | 133836209 | rs10793821  | 0.03% | 0.02% | 0.09% |
| 11 | 76260543  | rs11290954  | 0.03% | 0.02% | 0.08% |
| 6  | 43694598  | rs4711748   | 0.03% | 0.02% | 0.08% |
| 19 | 51355650  | rs266863    | 0.03% | 0.02% | 0.08% |
| 19 | 17214073  | rs11666569  | 0.03% | 0.02% | 0.08% |
| 1  | 204556990 | rs55664108  | 0.03% | 0.02% | 0.08% |
| 3  | 106962521 | rs1283104   | 0.03% | 0.02% | 0.08% |
| 11 | 7556577   | rs12791447  | 0.03% | 0.02% | 0.08% |
| 17 | 36047417  | rs3110641   | 0.03% | 0.02% | 0.07% |
| 6  | 32400939  | rs3129859   | 0.02% | 0.02% | 0.07% |
| 2  | 8597123   | rs62106670  | 0.02% | 0.02% | 0.06% |
| 16 | 57654576  | rs11863709  | 0.02% | 0.02% | 0.06% |
| 3  | 152004202 | rs182314334 | 0.02% | 0.02% | 0.06% |
| 9  | 22041998  | rs17694493  | 0.02% | 0.02% | 0.06% |
| 1  | 205731166 | rs34848415  | 0.02% | 0.02% | 0.05% |
| 5  | 172955855 | rs6860868   | 0.02% | 0.02% | 0.05% |
| 20 | 31347512  | rs11480453  | 0.02% | 0.02% | 0.05% |
| 18 | 51772473  | rs8093601   | 0.02% | 0.01% | 0.05% |
| 18 | 53230859  | rs28607662  | 0.02% | 0.01% | 0.05% |
| 10 | 854691    | rs141536087 | 0.02% | 0.01% | 0.04% |
| 3  | 127948958 | rs34834087  | 0.02% | 0.01% | 0.04% |
| 10 | 104398895 | rs12764219  | 0.01% | 0.01% | 0.04% |
| 2  | 202123479 | rs59308963  | 0.01% | 0.01% | 0.04% |
| 4  | 74349158  | rs1894292   | 0.01% | 0.01% | 0.04% |
| 5  | 1287194   | rs2853677   | 0.01% | 0.01% | 0.04% |
| 6  | 34793124  | rs9469899   | 0.01% | 0.01% | 0.04% |
| 1  | 150563440 | rs11352831  | 0.01% | 0.01% | 0.03% |
| 14 | 53409931  |             | 0.01% | 0.01% | 0.03% |
| 18 | 73036165  | rs10460109  | 0.01% | 0.01% | 0.03% |
| X  | 66865496  | rs5919402   | 0.01% | 0.01% | 0.03% |
| 3  | 141093285 | rs7624084   | 0.01% | 0.01% | 0.03% |
| 9  | 19055965  | rs1048169   | 0.01% | 0.01% | 0.03% |
| 11 | 7547587   | rs61890184  | 0.01% | 0.01% | 0.03% |
| 2  | 111893096 | rs11691517  | 0.01% | 0.01% | 0.03% |
| 20 | 52455205  | rs6091758   | 0.01% | 0.01% | 0.03% |
| 7  | 40875192  | rs17621345  | 0.01% | 0.01% | 0.03% |
| 17 | 30098749  | rs142444269 | 0.01% | 0.01% | 0.03% |
| X  | 11482634  | rs17321482  | 0.01% | 0.01% | 0.03% |
| 10 | 90195149  | rs1935581   | 0.01% | 0.01% | 0.02% |
| 2  | 10138585  |             | 0.01% | 0.01% | 0.02% |
| 18 | 76770820  | rs9959454   | 0.01% | 0.01% | 0.02% |
| 2  | 238358584 | rs60079197  | 0.01% | 0.01% | 0.02% |
| 14 | 71091142  | rs11158871  | 0.01% | 0.01% | 0.02% |

|    |              |             |        |        |        |
|----|--------------|-------------|--------|--------|--------|
| 15 | 40922915     | rs4924487   | 0.01%  | 0.01%  | 0.02%  |
| 22 | 40428706     | rs6001723   | 0.01%  | <0.01% | 0.02%  |
| 22 | 19749525     | rs1978060   | 0.01%  | <0.01% | 0.02%  |
| 10 | 122796182    | rs1004934   | 0.01%  | <0.01% | 0.02%  |
| 10 | 114712154    | rs7094871   | 0.01%  | <0.01% | 0.01%  |
| 6  | 32192331     | rs3096702   | 0.01%  | <0.01% | 0.01%  |
| 7  | 97817321     | rs11763970  | 0.01%  | <0.01% | 0.01%  |
| 5  | 177968915    | rs4976790   | 0.01%  | <0.01% | 0.01%  |
| 14 | 64693912     | rs58262369  | 0.01%  | <0.01% | 0.01%  |
| 2  | 43637998     | rs7591218   | <0.01% | <0.01% | 0.01%  |
| 8  | 128114146 ¥  | rs78511380  | <0.01% | <0.01% | 0.01%  |
| 11 | 47421962     | rs59111863  | <0.01% | <0.01% | 0.01%  |
| 14 | 23305649     | rs1004030   | <0.01% | <0.01% | 0.01%  |
| 12 | 48365265     | rs4760607   | <0.01% | <0.01% | 0.01%  |
| 6  | 160779134    | rs641990    | <0.01% | <0.01% | 0.01%  |
| 11 | 134266372    | rs878987    | <0.01% | <0.01% | 0.01%  |
| 10 | 46082985     | rs76934034  | <0.01% | <0.01% | 0.01%  |
| 12 | 65012824     | rs7968403   | <0.01% | <0.01% | 0.01%  |
| 8  | 23440180     | rs11135749  | <0.01% | <0.01% | <0.01% |
| 7  | 20414110     | rs11452686  | <0.01% | <0.01% | <0.01% |
| 4  | 95487714     | rs2452593   | <0.01% | <0.01% | <0.01% |
| 6  | 32988695     | rs9296068   | <0.01% | <0.01% | <0.01% |
| 6  | 30601232     | rs12665339  | <0.01% | <0.01% | <0.01% |
| 18 | 56746315     | rs12956892  | <0.01% | <0.01% | <0.01% |
| 11 | 1507512      | rs1881502   | <0.01% | <0.01% | <0.01% |
| 9  | 132576060    | rs1182      | <0.01% | <0.01% | <0.01% |
| 15 | 66764641     | rs112293876 | <0.01% | <0.01% | <0.01% |
| 20 | 61008583     | rs11204424  | <0.01% | <0.01% | <0.01% |
| 22 | 43525176     | rs909666    | <0.01% | <0.01% | <0.01% |
| X  | 52695895     | rs5943724   | <0.01% | <0.01% | <0.01% |
| 19 | 32167803     | rs118005503 | <0.01% | <0.01% | <0.01% |
| 4  | 74442349     | rs17804499  | <0.01% | <0.01% | <0.01% |
| 19 | 42700947     | rs61088131  | <0.01% | <0.01% | <0.01% |
| 6  | 109279211    | rs12209480  | <0.01% | <0.01% | <0.01% |
| 2  | 10756343     |             | <0.01% | <0.01% | <0.01% |
| X  | 70142030     | rs5937025   | <0.01% | <0.01% | <0.01% |
| 17 | 56456120     | rs2680708   | <0.01% | <0.01% | <0.01% |
| 11 | 66951965     | rs12785905  | <0.01% | <0.01% | <0.01% |
| 2  | 66652885*    | rs74702681  | 0%     | 0%     | 0%     |
| 2  | 242135265*   | rs77559646  | 0%     | 0%     | 0%     |
| 2  | 242139600*   | rs77482050  | 0%     | 0%     | 0%     |
| 3  | 169093100*   | rs142436749 | 0%     | 0%     | 0%     |
| 5  | 1292118*     | rs71595003  | 0%     | 0%     | 0%     |
| 5  | 169172133*   | rs76551843  | 0%     | 0%     | 0%     |
| 8  | 128077146 ¥* | rs77541621  | 0%     | 0%     | 0%     |
| 8  | 128103466 ¥* | rs190257175 | 0%     | 0%     | 0%     |
| 8  | 128104117 ¥* | rs183373024 | 0%     | 0%     | 0%     |
| 11 | 58919922*    |             | 0%     | 0%     | 0%     |
| 11 | 108143456*   | rs1800057   | 0%     | 0%     | 0%     |
| 11 | 125054793*   | rs138466039 | 0%     | 0%     | 0%     |
| 15 | 56385868*    | rs33984059  | 0%     | 0%     | 0%     |
| 21 | 42897136*    | rs145013758 | 0%     | 0%     | 0%     |
| 22 | 28888939*    | rs9625483   | 0%     | 0%     | 0%     |

† 8q24 variant associated with PCa in men of African ancestry

¥ 8q24 variant associated with PCa in men of European ancestry

\* Very rare or monomorphic in African ancestry populations

## **Supplementary Note**

This work was supported by NIH grants U19CA214253, R01CA165862, U19 CA148537, and K99CA246063. This work is also supported by the Achievement Rewards for College Scientists Foundation Los Angeles Founder Chapter

The AAPC studies were supported as follows:

**MEC:** The MEC and the genotyping in this study were supported by NIH grants CA63464, CA54281, CA1326792, CA148085 and HG004726. Cancer incidence data for the MEC and LAAPC studies have been collected by the Los Angeles Cancer Surveillance Program of the University of Southern California with Federal funds from the NCI, NIH, Department of Health and Human Services, under Contract No. N01-PC-35139, and the California Department of Health Services as part of the state-wide cancer reporting program mandated by California Health and Safety Code Section 103885, and grant number 1U58DP000807-3 from the Centers for Disease Control and Prevention.

**PLCO:** Genotyping of the **PLCO** samples was funded by the Intramural Research Program of the Division of Cancer Epidemiology and Genetics, NCI, NIH. The authors thank Drs. Christine Berg and Philip Prorok, Division of Cancer Prevention at the National Cancer Institute, the screening center investigators and staff of the PLCO Cancer Screening Trial for their contributions to the PLCO Cancer Screening Trial. We thank Mr. Thomas Riley, Mr. Craig Williams, Mr. Matthew Moore, and Ms. Shannon Merkle at Information Management Services, Inc., for their management of the data and Ms. Barbara O'Brien and staff at Westat, Inc. for their contributions to the PLCO Cancer



Screening Trial. We also thank the PLCO study participants for their contributions to making this study possible.

**MDA:** MDA was supported by grants, CA68578, ES007784, DAMD W81XWH-07-1-0645, and CA140388.

**LAAPC** was funded by grant 99-00524V-10258 from the Cancer Research Fund, under Interagency Agreement #97-12013 (University of California contract #98-00924V) with the Department of Health Services Cancer Research Program. Cancer incidence data for the MEC and LAAPC studies have been collected by the Los Angeles Cancer Surveillance Program of the University of Southern California with Federal funds from the NCI, NIH, Department of Health and Human Services, under Contract No. N01-PC-35139, and the California Department of Health Services as part of the state-wide cancer reporting program mandated by California Health and Safety Code Section 103885, and grant number 1U58DP000807-3 from the Centers for Disease Control and Prevention

**KCPCS** was supported by NIH grants CA056678, CA082664 and CA092579, with additional support from the Fred Hutchinson Cancer Research Center. We thank the participants in these studies, and Ms. Suzanne Kolb for help with study management.

**GECAP** was supported by NIH grant ES011126.

**CaP Genes** was supported by CA88164 and CA127298.

**IPCG** was supported by the generous support from donors to The Patrick C. Walsh Hereditary Prostate Cancer Research Program at The Brady Urological Institute.

**DCPC** was supported by NIH grant S06GM08016 and DOD grants DAMD W81XWH-07-1-0203, DAMD W81XWH-06-1-0066 and DOD W81XWH-10-1-0532.

**CPS-II** is supported by the American Cancer Society.

**PCBP:** PCBP was supported by NHGRI contract N01HG25487 and NCI grant R01CA114379

**SCPCS:** SCPCS is funded by CDC grant S1135-19/19, and SCPCS sample preparation was conducted at the Epidemiology Biospecimen Core Lab that is supported in part by the Vanderbilt-Ingram Cancer Center (P30 CA68485).

**SELECT** is funded by Public Health Service cooperative Agreement grant CA37429 awarded by the National Cancer Institute as well as 5UM1CA182883 from the Office of Dietary Supplements at the National Institutes of Health. The authors thank the site investigators and staff and, most importantly, the participants from SELECT who donated their time to this trial.

**SCCS** is funded by NIH grant CA092447. SCCS sample preparation was conducted at the Epidemiology Biospecimen Core Lab that is supported in part by the Vanderbilt Ingram Cancer Center (CA68485). Data on SCCS cancer cases used in this publication were provided by the Alabama Statewide Cancer Registry; Kentucky Cancer Registry; Tennessee Department of Health, Office of Cancer Surveillance; Florida Cancer Data System; North Carolina Central Cancer Registry, North Carolina Division of Public Health; Georgia Comprehensive Cancer Registry; Louisiana Tumor Registry; Mississippi Cancer Registry; South Carolina Central Cancer Registry; Virginia Department of Health, Virginia Cancer Registry; Arkansas Department of Health, Cancer Registry. The Arkansas Central Cancer Registry is fully funded by a grant from National Program of Cancer Registries, Centers for Disease Control and Prevention (CDC). Data on SCCS cancer cases from Mississippi were collected by the Mississippi

Cancer Registry which participates in the National Program of Cancer Registries (NPCR) of the Centers for Disease Control and Prevention (CDC). The contents of this publication are solely the responsibility of the authors and do not necessarily represent the official views of the CDC or the Mississippi Cancer Registry.

The ELLIPSE/PRACTICAL OncoArray studies in men of African ancestry were supported as follows:

**CeRePP:** The authors thank Cecile Gaffory for technical assistance.

**Karuprostate:** The Karuprostate study was supported by the French National Health Directorate and by the Association pour la Recherche sur les Tumeurs de la Prostate. Séverine Ferdinand.

**MEC:** The MEC was supported by NIH grants CA63464, CA54281 and CA098758.

**MIAMI (WFPCS):** WFPCS was supported by a grant from the American Cancer Society (No. CNE-101119 to J.J.H.), a pilot grant from the Comprehensive Cancer Center of Wake Forest University (CA12197 to J.J.H.) and a grant from the National Research Foundation to the Wake Forest University's General Clinical Research Center (M01-RR07122). The authors are grateful to study participants. We also want to acknowledge the contributions of Frank M. Torti, MD; Robert Lee, MD; Charles J. Rosser, MD; Dean G. Assimos, MD; Elizabeth Albertson, MD; Dominick J. Carbone, MD; William Rice, MD; Francis O'Brien, MD; Ray Morrow, MD; Franklyn Millman, MD; Nadine Shelton, Joel Anderson, Shirley Cothren, Eunkyung Chang, the General Clinical Research Center, the Urology Clinic and the Internal Medicine Clinic.

**MOFFITT:** The Moffitt group was supported by the US National Cancer Institute (R01CA128813, PI: J.Y. Park).

**NMHS:** Funding for the Nashville Men's Health Study (NMHS) was provided by the National Institutes of Health Grant numbers: RO1CA121060

**PLCO:** Genotyping of the PLCO samples was funded by the Intramural Research Program of the Division of Cancer Epidemiology and Genetics, NCI, NIH. The authors thank Drs. Christine Berg and Philip Prorok, Division of Cancer Prevention at the National Cancer Institute, the screening center investigators and staff of the PLCO Cancer Screening Trial for their contributions to the PLCO Cancer Screening Trial. We thank Mr. Thomas Riley, Mr. Craig Williams, Mr. Matthew Moore, and Ms. Shannon Merkle at Information Management Services, Inc., for their management of the data and Ms. Barbara O'Brien and staff at Westat, Inc. for their contributions to the PLCO Cancer Screening Trial. We also thank the PLCO study participants for their contributions to making this study possible.

**SFPCS:** SFPCS was funded by grant 99-00527V-10182 from the California Cancer Research Fund under Interagency Agreement #97-12013 (University of California contract #98-00924V) with the Department of Health Services Cancer Research Program. Cancer incidence data used in this study have been collected by the Greater Bay Area Cancer Registry of the Cancer Prevention Institute of California under contract N01-PC-35136 with the National Cancer Institute and with support of the California Cancer Registry, a project of the Cancer Surveillance Section, California Department of Health and Human Services, under subcontract 1006128 with the Public Health Institute.

**PCPT:** PCPT is funded by Public Health Service grants U10CA37429 and 5UM1CA182883 from the National Cancer Institute. The authors thank the site investigators and staff and, most importantly, the participants from PCPT who donated their time to this trial.

**SELECT:** SELECT is funded by Public Health Service cooperative Agreement grant CA37429 awarded by the National Cancer Institute, National Institutes of Health. The authors thank the site investigators and staff and, most importantly, the participants from SELECT who donated their time to this trial.

**WUGS/WUPCS:** WUGS would like to thank the following for funding support: The Anthony DeNovi Fund, the Donald C. McGraw Foundation, and the St. Louis Men's Group Against Cancer.

**UGANDA:** The UGANDA study was supported by R01CA165862.

**SABOR:** The SABOR research is supported by NIH/NCI Early Detection Research Network, grant U01 CA0866402-12. Also supported by the Cancer Center Support Grant to the Cancer Therapy and Research Center from the National Cancer Institute (US) P30 CA054174.

**PCaP:** The North Carolina - Louisiana Prostate Cancer Project (PCaP) is carried out as a collaborative study supported by the Department of Defense contract DAMD 17-03-2-0052. The authors thank the staff, advisory committees and research subjects participating in the PCaP study for their important contributions. We would also like to acknowledge the UNC BioSpecimen Facility and the LSUHSC Pathology Lab for our DNA extractions, blood processing, storage and sample disbursement (<https://genome.unc.edu/bsp>).

**EPICAP:** The EPICAP study was supported by grants from Ligue Nationale Contre le Cancer, Ligue départementale du Val de Marne; Fondation de France; Agence Nationale de sécurité sanitaire de l'alimentation, de l'environnement et du travail (ANSES). The EPICAP study group would like to thank all urologists, Antoinette Anger and Hasina Randrianasolo (study monitors), Anne-Laure Astolfi, Coline Bernard, Oriane Noyer, Marie-Hélène De Campo, Sandrine Margaroline, Louise N'Diaye, Sabine Perrier-Bonnet (Clinical Research nurses).

**BioVU:** The dataset(s) used for the analyses described were obtained from Vanderbilt University Medical Center's BioVU which is supported by institutional funding and by the National Center for Research Resources, Grant UL1 RR024975-01 (which is now at the National Center for Advancing Translational Sciences, Grant 2 UL1 TR000445-06).

**PROtEuS:** PROtEuS was supported financially through grants from the Canadian Cancer Society [13149, 19500, 19864, 19865] and the Cancer Research Society, in partnership with the Ministère de l'enseignement supérieur, de la recherche, de la science et de la technologie du Québec, and the Fonds de la recherche du Québec - Santé. PROtEuS would like to thank its collaborators, research personnel, and urologists. We also wish to acknowledge the special contribution made by Drs. Ann Hsing and Anand Chokkalingam to the conception of the genetic component of the study.

**CPDR:** This research was supported by funds from the Center for Prostate Disease Research, Uniformed Services University Program, HU0001-10-2-0002 (PI: COL Inger L. Rosner, MD).

**UKGPCS** would also like to thank the following for funding support: The Institute of Cancer Research and The Everyman Campaign, The Prostate Cancer Research Foundation, Prostate Research Campaign UK (now Prostate Action), The Orchid Cancer Appeal, The National Cancer Research Network UK, The National Cancer Research Institute (NCRI) UK. We are grateful for support of NIHR funding to the NIHR Biomedical Research Centre at The Institute of Cancer Research and The Royal Marsden NHS Foundation Trust. UKGPCS should also like to acknowledge the NCRN nurses, data managers and Consultants for their work in the UKGPCS study.

**UM-PCGP:** We appreciate the support from both the University of Michigan School of Medicine and the Duke University School of Medicine.
